# Supplementary material for: Magnesium oxide clusters as promising candidates for hydrogen storage
Source: Royal Society of Chemistry journal article supplement (doi:10.1039/c9cp05075b), 2019-01-01
Supplement: c9cp05075b1.pdf [file c9cp05075b1.pdf]

## Magnesium Oxides Clusters as Promising Candidates for Hydrogen Storage

Juan Pablo Mojica-Sánchez,<sup>a,b</sup> Tania Isabel Zarate-López,<sup>b</sup> José Manuel Flores-Álvarez,<sup>b</sup> Juan Reyes-Gómez,<sup>c</sup> Kayim Pineda Urbina<sup>b\*</sup> and Zeferino Gómez-Sandoval.<sup>b\*</sup>

---

<sup>a</sup>*Instituto Tecnológico José Mario Molina Pasquel y Henríquez Campus Tamazula de Gordiano, Carretera Tamazula-Santa Rosa No. 329, 49650, Tamazula de Gordiano, Jalisco, México.*

<sup>b</sup>*Facultad de Ciencias Químicas, Universidad de Colima, Km. 9 Carretera Colima-Coquimatlán, 28400, Coquimatlán, Colima, México.*

<sup>c</sup>*Facultad de Ciencias, Universidad de Colima, Bernal Díaz del Castillo No. 340, Col. Villas San Sebastián, 28045, Colima, Colima, México.*

### supplementary material for review

**Table S1.** XYZ Coordinates of the (MgO)<sub>n</sub>, n=1-10 clusters optimized at a def2-TZVP/BP86/D3 level theory.

| <b>MgO</b> |              |             |              |
|------------|--------------|-------------|--------------|
| 12         | -1.152373000 | 0.840040000 | -1.873212000 |
| 8          | -0.527463000 | 2.196199000 | -0.959723000 |

| <b>(MgO)<sub>2</sub></b> |              |              |              |
|--------------------------|--------------|--------------|--------------|
| 12                       | -1.117157000 | -0.981520000 | 1.113788000  |
| 12                       | 0.384615000  | -0.484047000 | -0.706206000 |
| 8                        | -1.477133000 | -0.210904000 | -0.570318000 |
| 8                        | 0.743498000  | -1.254999000 | 0.978671000  |

| <b>(MgO)<sub>3</sub></b> |              |             |              |
|--------------------------|--------------|-------------|--------------|
| 12                       | 0.778375000  | 1.416144000 | 0.480002000  |
| 12                       | -1.250266000 | 0.137816000 | -1.182437000 |

|    |              |              |              |
|----|--------------|--------------|--------------|
| 12 | 0.143498000  | -1.405631000 | 0.864115000  |
| 8  | 1.226426000  | -0.054073000 | 1.501396000  |
| 8  | -0.405806000 | 1.753263000  | -0.894651000 |
| 8  | -1.149100000 | -1.550828000 | -0.444976000 |

**(MgO)<sub>4</sub>**

|    |              |              |              |
|----|--------------|--------------|--------------|
| 12 | -1.080274000 | 0.720685000  | -1.759190000 |
| 12 | 1.014149000  | -0.711838000 | 1.876293000  |
| 12 | -0.433959000 | -2.092867000 | -0.536808000 |
| 12 | 0.367889000  | 2.101727000  | 0.653932000  |
| 8  | 0.483474000  | -2.244165000 | 1.035459000  |
| 8  | 1.124304000  | 1.108123000  | 1.987127000  |
| 8  | -0.549541000 | 2.253004000  | -0.918346000 |
| 8  | -1.190414000 | -1.099266000 | -1.869964000 |

**(MgO)<sub>5</sub>**

|    |              |             |              |
|----|--------------|-------------|--------------|
| 12 | 2.821898000  | 0.000000000 | -0.500763000 |
| 12 | -2.416216000 | 0.000000000 | -1.149803000 |
| 12 | 1.439698000  | 0.000000000 | 2.453795000  |
| 12 | 0.438388000  | 0.000000000 | -2.727920000 |
| 12 | -1.797669000 | 0.000000000 | 2.052807000  |
| 8  | -2.899622000 | 0.000000000 | 0.604636000  |
| 8  | 2.181212000  | 0.000000000 | -2.203999000 |
| 8  | -1.379394000 | 0.000000000 | -2.645314000 |
| 8  | -0.278197000 | 0.000000000 | 3.054242000  |
| 8  | 2.862193000  | 0.000000000 | 1.318658000  |

**(MgO)<sub>6</sub>**

|    |              |              |              |
|----|--------------|--------------|--------------|
| 12 | -0.338100000 | -1.851390000 | -0.866221000 |
| 12 | 0.166119000  | -0.548106000 | 1.993757000  |
| 12 | 1.921500000  | -0.762221000 | 0.010435000  |
| 12 | -1.933170000 | 0.765514000  | -0.006122000 |
| 12 | 0.326434000  | 1.854674000  | 0.870527000  |
| 12 | -0.177762000 | 0.551393000  | -1.989455000 |
| 8  | 1.695431000  | 0.597381000  | 1.344628000  |
| 8  | -0.572747000 | 2.016713000  | -0.816181000 |
| 8  | 1.150665000  | -0.810785000 | -1.745447000 |
| 8  | -1.707088000 | -0.594085000 | -1.340330000 |
| 8  | 0.561080000  | -2.013419000 | 0.820489000  |
| 8  | -1.162322000 | 0.814062000  | 1.749751000  |

**(MgO)<sub>7</sub>**

|    |              |              |              |
|----|--------------|--------------|--------------|
| 12 | 0.839085000  | -0.873829000 | 1.599003000  |
| 12 | -0.774417000 | -2.725358000 | 0.644275000  |
| 12 | 0.332615000  | -1.443714000 | -1.374330000 |

|    |              |              |              |
|----|--------------|--------------|--------------|
| 12 | -1.938745000 | -0.375117000 | 0.392137000  |
| 12 | -0.019828000 | 2.159312000  | 0.925608000  |
| 12 | -0.450225000 | 1.674959000  | -1.600969000 |
| 12 | 1.910203000  | 1.251221000  | -0.575449000 |
| 8  | 1.074416000  | -2.280087000 | 0.244028000  |
| 8  | 1.437749000  | 0.897050000  | 1.297363000  |
| 8  | 0.886555000  | 0.276751000  | -1.938698000 |
| 8  | -1.061945000 | -1.275068000 | 1.905478000  |
| 8  | 0.807751000  | 2.850065000  | -0.694158000 |
| 8  | -1.538312000 | -1.811114000 | -0.891015000 |
| 8  | -1.585564000 | 1.439813000  | -0.016095000 |

**(MgO)<sub>8</sub>**

|    |              |              |              |
|----|--------------|--------------|--------------|
| 12 | -0.200168775 | -0.040927983 | -0.299438117 |
| 8  | 0.151547852  | -1.225535370 | -1.763789416 |
| 8  | 1.675595931  | -0.004166515 | 0.356081867  |
| 12 | 1.970255775  | -1.357841401 | -0.967045221 |
| 8  | -0.924033603 | -0.663137462 | 1.369905317  |
| 12 | -1.770508544 | -2.359939723 | 1.468107495  |
| 8  | -1.467260305 | -3.682719889 | 0.006589754  |
| 12 | -0.089042738 | -3.031629240 | -1.124790617 |
| 8  | 1.810426660  | -3.231009162 | -0.556046802 |
| 12 | -1.060616734 | -4.922491440 | 1.420059898  |
| 8  | 0.728834841  | -5.174495781 | 2.059472098  |
| 12 | 1.846277322  | -3.825389526 | 1.246595460  |
| 8  | -1.596295513 | -3.673349108 | 2.871025977  |
| 12 | 0.976007749  | -0.862624590 | 1.938377199  |
| 8  | 1.545711945  | -2.503048345 | 2.705240618  |
| 12 | 0.250996137  | -3.759575466 | 3.370751489  |

**(MgO)<sub>9</sub>**

|    |             |              |              |
|----|-------------|--------------|--------------|
| 8  | 0.278595379 | 0.104133951  | 0.622056344  |
| 12 | 2.019495397 | 0.837077080  | 1.468921551  |
| 8  | 3.917841684 | 0.338138010  | 0.811313337  |
| 12 | 4.016861466 | -0.972671551 | -0.787767090 |
| 8  | 2.353454154 | -1.775781425 | -1.722145458 |
| 12 | 0.513562900 | -1.197932548 | -0.969968169 |
| 12 | 0.571719396 | -1.467074637 | 1.752008388  |
| 8  | 2.056446763 | -0.747800079 | 2.717473640  |
| 8  | 0.580850042 | -2.741861655 | 0.327682433  |
| 12 | 2.362504767 | -3.089610841 | -0.271242159 |
| 8  | 4.013617867 | -2.521097789 | 0.506250039  |
| 12 | 3.712654008 | -1.265055825 | 1.915404390  |
| 12 | 0.507106911 | 1.525066013  | -0.704651482 |
| 8  | 1.989138092 | 2.370333826  | 0.157349551  |
| 8  | 0.513516820 | 0.376305016  | -2.232448876 |
| 12 | 3.648024237 | 1.727006520  | -0.541322883 |
| 12 | 2.297853031 | -0.097495930 | -2.727978971 |
| 8  | 3.946273088 | 0.596995866  | -2.053921587 |

**(MgO)<sub>10</sub>**

|    |              |              |              |
|----|--------------|--------------|--------------|
| 8  | 2.512318422  | 1.825316195  | -0.569662386 |
| 8  | -0.959625529 | 2.953472539  | -0.569659621 |
| 8  | 2.512318479  | -1.825316345 | -0.569662496 |
| 8  | -3.105336513 | -0.000000071 | -0.569648690 |
| 8  | -0.959625594 | -2.953472569 | -0.569659637 |
| 12 | -2.422270015 | -1.759907400 | -0.461752313 |
| 12 | 0.925247943  | -2.847646481 | -0.461754699 |
| 12 | 0.925247877  | 2.847646370  | -0.461754695 |
| 12 | -2.422270042 | 1.759907370  | -0.461752225 |
| 12 | 2.994081583  | 0.000000015  | -0.461764575 |
| 12 | 2.422270033  | 1.759907339  | 1.467326283  |
| 12 | -0.925247882 | 2.847646353  | 1.467328771  |
| 12 | 2.422269998  | -1.759907284 | 1.467326212  |
| 12 | -2.994081490 | 0.000000007  | 1.467338505  |
| 12 | -0.925247924 | -2.847646271 | 1.467328755  |
| 8  | -2.512318410 | -1.825316133 | 1.575236360  |
| 8  | 0.959625530  | -2.953472343 | 1.575233694  |
| 8  | 0.959625575  | 2.953472482  | 1.575233706  |
| 8  | -2.512318412 | 1.825316168  | 1.575236441  |
| 8  | 3.105336373  | 0.000000059  | 1.575222610  |

**Table S2.** XYZ Coordinates of the (MgO)<sub>n</sub>, n=1-10 clusters with H<sub>2</sub> molecules optimized at a def2-TZVP/BP86/D3 level theory.

**MgO-(H<sub>2</sub>)<sub>9</sub>**

|    |              |              |              |
|----|--------------|--------------|--------------|
| 12 | -0.891123000 | 1.742886000  | -2.333839000 |
| 8  | -0.120010000 | 1.325045000  | -0.816817000 |
| 1  | 0.551989000  | 0.967758000  | 1.935630000  |
| 1  | 0.371364000  | 1.061812000  | 1.199763000  |
| 1  | 1.543601000  | 2.875587000  | -1.686619000 |
| 1  | 1.930127000  | 3.403422000  | -2.083113000 |
| 1  | -0.351942000 | 3.964373000  | -3.566345000 |
| 1  | -1.000123000 | 3.858239000  | -3.944259000 |
| 1  | 1.472783000  | -0.079318000 | -1.750232000 |
| 1  | 1.943301000  | -0.546246000 | -2.131137000 |
| 1  | -2.559001000 | 0.039818000  | -3.402191000 |
| 1  | -2.710598000 | 0.573993000  | -3.917836000 |
| 1  | 0.868543000  | 0.930751000  | -4.066986000 |
| 1  | 0.541212000  | 1.259645000  | -4.666565000 |
| 1  | -1.727384000 | -1.341535000 | -1.141422000 |
| 1  | -1.276335000 | -0.747444000 | -0.971777000 |

|   |              |             |              |
|---|--------------|-------------|--------------|
| 1 | -2.780590000 | 1.630078000 | -0.521459000 |
| 1 | -3.485519000 | 1.773033000 | -0.773623000 |
| 1 | -1.091364000 | 4.383686000 | -0.446903000 |
| 1 | -0.801121000 | 3.678525000 | -0.407232000 |

**(MgO)<sub>2</sub>-(H<sub>2</sub>)<sub>13</sub>**

|    |              |              |              |
|----|--------------|--------------|--------------|
| 12 | -1.165335000 | -0.599029000 | 0.696662000  |
| 12 | 0.901045000  | -1.167934000 | -0.533123000 |
| 8  | -0.602198000 | -0.147794000 | -1.056385000 |
| 8  | 0.341997000  | -1.618051000 | 1.219248000  |
| 1  | 2.186312000  | -0.417162000 | -2.391588000 |
| 1  | 1.480773000  | -0.119723000 | -2.349693000 |
| 1  | 2.081807000  | -1.816612000 | 2.640604000  |
| 1  | 2.726568000  | -1.858979000 | 3.047047000  |
| 1  | -0.803115000 | -2.455023000 | 3.811496000  |
| 1  | -0.429207000 | -2.289355000 | 3.164258000  |
| 1  | -2.500447000 | -1.398203000 | 2.374811000  |
| 1  | -3.011769000 | -0.929660000 | 2.063838000  |
| 1  | 2.437938000  | -0.189912000 | 0.772832000  |
| 1  | 2.830339000  | 0.136072000  | 0.205397000  |
| 1  | -1.417944000 | 0.024350000  | -3.103790000 |
| 1  | -1.681526000 | 0.034477000  | -3.820882000 |
| 1  | 2.163848000  | -2.822434000 | 0.109044000  |
| 1  | 2.589405000  | -2.843046000 | -0.528489000 |
| 1  | -2.576495000 | -1.438176000 | -0.901908000 |
| 1  | -0.727316000 | 0.966837000  | 2.550604000  |
| 1  | -0.233670000 | 0.387033000  | 2.463446000  |
| 1  | 0.410663000  | -2.887503000 | -2.252004000 |
| 1  | -0.075429000 | -2.298888000 | -2.214692000 |
| 1  | -0.274962000 | -3.807374000 | 0.920970000  |
| 1  | -0.490966000 | -4.518128000 | 0.744883000  |
| 1  | -2.693725000 | 1.227105000  | 0.498655000  |
| 1  | -3.114843000 | -1.795016000 | -0.488243000 |
| 1  | -2.223557000 | 1.105746000  | -0.102048000 |
| 1  | 0.167431000  | 1.957582000  | -1.270317000 |
| 1  | 0.485510000  | 2.651624000  | -1.302141000 |

**(MgO)<sub>3</sub>-(H<sub>2</sub>)<sub>12</sub>**

|    |              |              |              |
|----|--------------|--------------|--------------|
| 12 | 0.316940000  | 1.292016000  | 0.744211000  |
| 12 | -1.066063000 | 0.016196000  | -1.578147000 |
| 12 | -0.455961000 | -1.596316000 | 0.880844000  |
| 8  | 0.377440000  | -0.221775000 | 1.809060000  |
| 8  | -0.340017000 | 1.607149000  | -0.966334000 |
| 8  | -1.247489000 | -1.662339000 | -0.797896000 |
| 1  | -0.969200000 | 1.612149000  | -3.169695000 |
| 1  | -1.284212000 | 1.231503000  | -3.755406000 |
| 1  | -3.113793000 | -0.692418000 | -2.120836000 |
| 1  | -3.315225000 | -0.051854000 | -2.482116000 |

|   |              |              |              |
|---|--------------|--------------|--------------|
| 1 | -2.660665000 | -3.222859000 | -1.642939000 |
| 1 | -3.146462000 | -3.730811000 | -1.935774000 |
| 1 | -0.420515000 | 4.461094000  | -1.912124000 |
| 1 | -0.406540000 | 3.731985000  | -1.691037000 |
| 1 | -0.967578000 | 3.186967000  | 1.601845000  |
| 1 | -1.051780000 | 3.077263000  | 0.850972000  |
| 1 | 1.448273000  | 2.356270000  | 2.690469000  |
| 1 | 1.272739000  | 1.610759000  | 2.746037000  |
| 1 | -0.902278000 | -1.716374000 | 3.063626000  |
| 1 | -1.368517000 | -2.323242000 | 3.041817000  |
| 1 | -0.765007000 | -4.023752000 | 0.969157000  |
| 1 | -1.013181000 | -3.688934000 | 0.327242000  |
| 1 | 1.677029000  | -2.899126000 | 1.431984000  |
| 1 | 1.627166000  | -2.166190000 | 1.648369000  |
| 1 | -0.318948000 | -1.632194000 | -2.945679000 |
| 1 | -0.131237000 | -1.210409000 | -3.556320000 |
| 1 | -3.730494000 | -1.374268000 | 1.172142000  |
| 1 | -3.233124000 | -1.479566000 | 0.606956000  |
| 1 | 2.388347000  | 2.436350000  | 0.089668000  |
| 1 | 1.863828000  | 2.381149000  | -0.463973000 |

**(MgO)<sub>4</sub>-(H<sub>2</sub>)<sub>14</sub>**

|    |              |              |              |
|----|--------------|--------------|--------------|
| 12 | -1.477820000 | -0.050134000 | -1.972956000 |
| 12 | 0.449206000  | -0.773920000 | 2.055621000  |
| 12 | -0.265993000 | -2.558044000 | -0.473227000 |
| 12 | -0.704232000 | 1.769360000  | 0.532439000  |
| 8  | 0.425087000  | -2.410106000 | 1.215982000  |
| 8  | 0.112808000  | 1.029263000  | 2.000585000  |
| 8  | -1.461908000 | 1.582394000  | -1.132034000 |
| 8  | -1.069243000 | -1.840170000 | -1.953793000 |
| 1  | -0.975895000 | 0.821891000  | -4.049413000 |
| 1  | -0.874421000 | 0.081612000  | -4.182644000 |
| 1  | -3.426096000 | -0.834407000 | -2.802778000 |
| 1  | -3.676672000 | -0.116774000 | -2.806265000 |
| 1  | -1.265303000 | -3.444463000 | -4.458852000 |
| 1  | -1.218280000 | -3.037196000 | -3.815904000 |
| 1  | 0.149928000  | -4.784953000 | -0.713708000 |
| 1  | -0.172382000 | -4.630706000 | -1.383948000 |
| 1  | 1.423906000  | -5.014128000 | 2.287340000  |
| 1  | 1.177041000  | -4.339418000 | 2.032133000  |
| 1  | 2.452358000  | -0.855132000 | 3.265395000  |
| 1  | 2.400533000  | -1.526103000 | 2.912682000  |
| 1  | -0.503967000 | -2.141439000 | 3.578237000  |
| 1  | -0.581680000 | -1.562606000 | 4.066536000  |
| 1  | 0.510182000  | 0.910725000  | 5.031070000  |
| 1  | 0.369609000  | 1.069046000  | 4.299295000  |
| 1  | 2.260000000  | 3.119348000  | 2.565685000  |
| 1  | 1.735789000  | 2.575394000  | 2.468106000  |
| 1  | 0.587100000  | 3.708428000  | 0.345477000  |

|   |              |             |              |
|---|--------------|-------------|--------------|
| 1 | 0.215408000  | 3.669001000 | -0.315536000 |
| 1 | -3.929992000 | 3.319149000 | -1.417412000 |
| 1 | -3.305234000 | 2.886375000 | -1.373051000 |
| 1 | -0.712328000 | 3.097131000 | -2.669660000 |
| 1 | -0.432966000 | 3.575981000 | -3.192256000 |
| 1 | -3.827523000 | 0.121197000 | 0.767556000  |
| 1 | -3.392655000 | 0.522299000 | 0.294887000  |
| 1 | -1.847759000 | 2.908113000 | 2.110320000  |
| 1 | -2.245556000 | 3.215750000 | 1.540451000  |

**(MgO)<sub>5</sub>-(H<sub>2</sub>)<sub>16</sub>**

|    |              |              |              |
|----|--------------|--------------|--------------|
| 12 | 3.486486000  | -0.394389000 | -1.582282000 |
| 12 | -1.684029000 | 0.599735000  | -0.873444000 |
| 12 | 3.143270000  | 0.654796000  | 1.522752000  |
| 12 | 0.517698000  | -0.435120000 | -3.086973000 |
| 12 | -0.071033000 | 1.277516000  | 1.961474000  |
| 8  | -1.538004000 | 1.085977000  | 0.883649000  |
| 8  | 2.322940000  | -0.709215000 | -2.953005000 |
| 8  | -1.155427000 | 0.064921000  | -2.541837000 |
| 8  | 1.682120000  | 1.202286000  | 2.473119000  |
| 8  | 4.094259000  | 0.053313000  | 0.077997000  |
| 1  | -0.059671000 | -2.611674000 | -3.881316000 |
| 1  | 0.697482000  | -2.594581000 | -3.816807000 |
| 1  | -2.610693000 | -1.363770000 | -3.542640000 |
| 1  | -3.078904000 | -1.868622000 | -3.869096000 |
| 1  | -3.544838000 | -0.658022000 | -0.270228000 |
| 1  | -3.489706000 | -0.884261000 | -0.992447000 |
| 1  | 3.325752000  | -0.679285000 | -4.966675000 |
| 1  | 3.665286000  | -0.657782000 | -5.648861000 |
| 1  | 5.629697000  | -0.758899000 | -2.318758000 |
| 1  | 5.239614000  | -0.898548000 | -2.955139000 |
| 1  | 7.035824000  | -0.170524000 | 0.598015000  |
| 1  | 6.288919000  | -0.115732000 | 0.453823000  |
| 1  | 3.961044000  | -0.703113000 | 3.257260000  |
| 1  | 4.360873000  | -0.934277000 | 2.654330000  |
| 1  | 2.495395000  | 2.649069000  | 4.969958000  |
| 1  | 2.278153000  | 2.282644000  | 4.337380000  |
| 1  | -1.078514000 | 1.042986000  | 4.089002000  |
| 1  | -0.328954000 | 1.075309000  | 4.209114000  |
| 1  | -1.662600000 | -1.627716000 | 2.461882000  |
| 1  | -1.743620000 | -0.992981000 | 2.049213000  |
| 1  | 4.930353000  | 2.063195000  | 1.945319000  |
| 1  | 4.457515000  | 2.328627000  | 2.476317000  |
| 1  | -0.529532000 | 3.623544000  | 2.456135000  |
| 1  | -1.090822000 | 3.334179000  | 2.031986000  |
| 1  | 0.575459000  | -1.926120000 | 0.247818000  |
| 1  | 1.003707000  | -1.809782000 | -0.362530000 |
| 1  | 0.655308000  | 0.016004000  | -5.360775000 |
| 1  | -0.049237000 | 0.255806000  | -5.213016000 |

|   |              |             |              |
|---|--------------|-------------|--------------|
| 1 | -3.173841000 | 2.311478000 | -0.781326000 |
| 1 | -3.298609000 | 2.230439000 | -1.526844000 |
| 1 | -2.440884000 | 1.965195000 | -4.536012000 |
| 1 | -2.131368000 | 1.476273000 | -4.040435000 |

(MgO)<sub>6</sub>-(H<sub>2</sub>)<sub>17</sub>

|    |              |              |              |
|----|--------------|--------------|--------------|
| 12 | 0.328594000  | -2.116951000 | -0.597804000 |
| 12 | 0.753834000  | -0.504153000 | 2.196891000  |
| 12 | 2.389753000  | -0.565716000 | 0.082101000  |
| 12 | -1.660427000 | 0.258907000  | 0.236366000  |
| 12 | 0.429393000  | 1.812685000  | 0.878857000  |
| 12 | -0.031072000 | 0.211373000  | -1.880204000 |
| 8  | 2.019736000  | 0.826897000  | 1.342955000  |
| 8  | -0.581248000 | 1.651341000  | -0.742918000 |
| 8  | 1.543057000  | -0.880043000 | -1.622057000 |
| 8  | -1.281101000 | -1.141494000 | -1.031822000 |
| 8  | 1.303425000  | -1.963811000 | 1.057302000  |
| 8  | -0.807274000 | 0.593287000  | 1.935280000  |
| 1  | -2.905909000 | -0.804324000 | 1.945881000  |
| 1  | -3.358789000 | -1.187030000 | 1.470551000  |
| 1  | -1.798005000 | -0.374625000 | -3.192004000 |
| 1  | -1.652564000 | 0.105722000  | -3.767553000 |
| 1  | 1.319421000  | 0.309330000  | -3.676942000 |
| 1  | 0.897231000  | 0.811043000  | -4.068521000 |
| 1  | -0.842873000 | -4.117402000 | -1.532853000 |
| 1  | -1.238006000 | -3.448073000 | -1.552116000 |
| 1  | 4.047896000  | -2.711161000 | 2.201004000  |
| 1  | 3.332883000  | -2.626974000 | 1.951846000  |
| 1  | 2.088366000  | -0.104556000 | 4.177684000  |
| 1  | 2.316438000  | 0.286869000  | 3.560271000  |
| 1  | -0.064054000 | 3.601766000  | 2.399839000  |
| 1  | -0.472923000 | 2.978047000  | 2.556089000  |
| 1  | -2.272433000 | 3.893362000  | -1.705557000 |
| 1  | -1.808675000 | 3.331082000  | -1.473325000 |
| 1  | -3.615652000 | 1.503289000  | -0.246190000 |
| 1  | -3.898667000 | 0.727056000  | -0.469384000 |
| 1  | 4.487010000  | -1.445760000 | -0.535770000 |
| 1  | 4.011402000  | -1.472203000 | -1.129534000 |
| 1  | 3.210617000  | 0.923084000  | -2.030374000 |
| 1  | 3.679009000  | 1.510379000  | -1.927066000 |
| 1  | -4.245217000 | -1.772095000 | -1.540489000 |
| 1  | -3.472439000 | -1.661388000 | -1.447221000 |
| 1  | 2.244883000  | 3.156612000  | 0.719477000  |
| 1  | 1.865837000  | 3.751990000  | 0.430572000  |
| 1  | -3.398278000 | 2.248728000  | 2.765944000  |
| 1  | -2.731854000 | 1.820472000  | 2.645260000  |
| 1  | -0.869633000 | 0.395684000  | 4.988800000  |
| 1  | -0.961188000 | 0.500729000  | 4.237594000  |
| 1  | 1.865794000  | -3.975883000 | -0.083505000 |
| 1  | 1.839405000  | -4.446732000 | -0.705049000 |



|   |             |              |             |
|---|-------------|--------------|-------------|
| 1 | 0.174753000 | -2.146284000 | 3.913677000 |
| 1 | 0.457795000 | -2.463446000 | 3.280570000 |

**(MgO)<sub>7</sub>-(H<sub>2</sub>)<sub>16</sub>**

|    |              |              |              |
|----|--------------|--------------|--------------|
| 12 | 0.877584000  | -0.544946000 | 1.251712000  |
| 12 | -0.391376000 | -2.771611000 | 0.529748000  |
| 12 | 0.530622000  | -1.522423000 | -1.638896000 |
| 12 | -1.924522000 | -0.659624000 | -0.012363000 |
| 12 | -0.466297000 | 2.208621000  | 0.252018000  |
| 12 | -0.760982000 | 1.376223000  | -2.244738000 |
| 12 | 1.645726000  | 1.469881000  | -1.155136000 |
| 8  | 1.366164000  | -2.036773000 | 0.066808000  |
| 8  | 1.175731000  | 1.252367000  | 0.750840000  |
| 8  | 0.807572000  | 0.183060000  | -2.397130000 |
| 8  | -0.939815000 | -1.222476000 | 1.604819000  |
| 8  | 0.276928000  | 2.826512000  | -1.452985000 |
| 8  | -1.268111000 | -2.151832000 | -1.114406000 |
| 8  | -1.864738000 | 1.122245000  | -0.627077000 |
| 1  | -3.407208000 | -1.169317000 | 1.608254000  |
| 1  | -4.009457000 | -1.033734000 | 1.161183000  |
| 1  | -2.462446000 | 3.535621000  | 1.041970000  |
| 1  | -2.611216000 | 2.937541000  | 0.589938000  |
| 1  | 0.197694000  | 4.340367000  | 0.209197000  |
| 1  | 0.050735000  | 4.529623000  | 0.939933000  |
| 1  | -0.116668000 | 4.257098000  | -3.085174000 |
| 1  | -0.307913000 | 4.679606000  | -3.693788000 |
| 1  | 2.856670000  | 1.166872000  | -3.018176000 |
| 1  | 3.415538000  | 1.651361000  | -2.826609000 |
| 1  | 1.274593000  | -4.288726000 | 0.411903000  |
| 1  | 0.875971000  | -4.927978000 | 0.560162000  |
| 1  | -0.720948000 | -3.998766000 | 2.698408000  |
| 1  | -0.872285000 | -3.246836000 | 2.692905000  |
| 1  | -0.136913000 | 1.040927000  | -4.373920000 |
| 1  | -0.677159000 | 1.481708000  | -4.685919000 |
| 1  | 2.202847000  | -0.369264000 | 3.241401000  |
| 1  | 2.184483000  | 0.293774000  | 2.867962000  |
| 1  | -1.444243000 | 1.540410000  | 2.868876000  |
| 1  | -1.355503000 | 0.835558000  | 2.586858000  |
| 1  | -2.875908000 | 2.057702000  | -2.560152000 |
| 1  | -2.769699000 | 2.294816000  | -3.277986000 |
| 1  | -1.963575000 | -4.177658000 | -0.282478000 |
| 1  | -1.933685000 | -4.725482000 | 0.253667000  |
| 1  | 3.191481000  | 2.317117000  | 0.243601000  |
| 1  | 3.686739000  | 2.540680000  | -0.294069000 |
| 1  | -2.151634000 | -1.111822000 | -2.971000000 |
| 1  | -2.405288000 | -0.713149000 | -3.571300000 |
| 1  | -0.047802000 | -3.227498000 | -3.000989000 |
| 1  | 0.619343000  | -3.210543000 | -3.368281000 |

|   |             |              |              |
|---|-------------|--------------|--------------|
| 1 | 3.262023000 | -0.894109000 | -0.517072000 |
| 1 | 3.852077000 | -0.454026000 | -0.723862000 |

**(MgO)<sub>8</sub>-(H<sub>2</sub>)<sub>16</sub>**

|    |              |              |              |
|----|--------------|--------------|--------------|
| 12 | -0.150419000 | 0.175987000  | -0.090040000 |
| 8  | 0.045125000  | -1.036282000 | -1.573240000 |
| 8  | 1.762490000  | 0.022491000  | 0.493670000  |
| 12 | 1.885823000  | -1.342935000 | -0.867930000 |
| 8  | -0.851555000 | -0.380649000 | 1.612733000  |
| 12 | -1.851269000 | -1.991583000 | 1.716118000  |
| 8  | -1.729355000 | -3.323687000 | 0.243135000  |
| 12 | -0.342841000 | -2.837863000 | -0.958196000 |
| 8  | 1.548713000  | -3.205211000 | -0.454439000 |
| 12 | -1.375347000 | -4.618909000 | 1.623748000  |
| 8  | 0.415191000  | -5.028182000 | 2.201990000  |
| 12 | 1.625496000  | -3.779863000 | 1.354407000  |
| 8  | -1.733695000 | -3.322469000 | 3.112802000  |
| 12 | 1.040838000  | -0.757835000 | 2.108666000  |
| 8  | 1.505774000  | -2.449591000 | 2.829755000  |
| 12 | 0.122969000  | -3.577370000 | 3.554475000  |
| 1  | 3.037976000  | 0.580730000  | -1.455959000 |
| 1  | 3.274035000  | 0.371640000  | -2.149768000 |
| 1  | 3.977604000  | -0.934221000 | 0.493938000  |
| 1  | 4.505802000  | -1.421960000 | 0.246350000  |
| 1  | 3.594529000  | -3.654424000 | 2.424994000  |
| 1  | 3.910864000  | -4.184637000 | 1.978685000  |
| 1  | 0.862586000  | -5.149163000 | 5.210381000  |
| 1  | 0.859741000  | -5.433280000 | 4.500588000  |
| 1  | 0.623223000  | -0.330003000 | -3.633448000 |
| 1  | 0.882232000  | -0.105732000 | -4.314326000 |
| 1  | -0.929615000 | -2.577873000 | -3.134217000 |
| 1  | -1.196081000 | -3.286799000 | -3.218154000 |
| 1  | 1.544348000  | -7.765760000 | 2.516505000  |
| 1  | 1.257374000  | -7.064056000 | 2.431077000  |
| 1  | -3.125067000 | -5.099464000 | 2.889832000  |
| 1  | -3.339096000 | -5.733075000 | 2.513148000  |
| 1  | -3.767721000 | -2.068168000 | 0.539023000  |
| 1  | -4.103584000 | -1.528761000 | 0.960457000  |
| 1  | 0.308803000  | 2.549999000  | -0.217572000 |
| 1  | 0.902527000  | 2.121554000  | 0.007696000  |
| 1  | 0.765410000  | 0.801935000  | 3.933538000  |
| 1  | 0.127542000  | 0.736128000  | 3.521171000  |
| 1  | -0.468673000 | -2.750276000 | 5.779823000  |
| 1  | -1.055336000 | -2.800206000 | 5.290731000  |
| 1  | 3.062177000  | -2.741410000 | -2.190569000 |
| 1  | 3.407851000  | -2.201136000 | -2.605073000 |
| 1  | 0.705335000  | -5.027086000 | -1.675321000 |

|   |              |              |              |
|---|--------------|--------------|--------------|
| 1 | 0.168718000  | -5.428774000 | -2.034993000 |
| 1 | -1.006220000 | -6.706850000 | 0.806374000  |
| 1 | -1.691259000 | -6.680493000 | 0.477414000  |
| 1 | -1.945820000 | 1.249975000  | -1.327061000 |
| 1 | -1.608359000 | 0.679188000  | -1.706822000 |

(MgO)<sub>9</sub>-(H<sub>2</sub>)<sub>18</sub>

|    |              |              |              |
|----|--------------|--------------|--------------|
| 8  | 0.374588000  | 0.613708000  | 0.200431000  |
| 12 | 2.113851000  | 1.089557000  | 1.199512000  |
| 8  | 3.936657000  | 0.250711000  | 0.739198000  |
| 12 | 3.952603000  | -1.115852000 | -0.806917000 |
| 8  | 2.274121000  | -1.666114000 | -1.874778000 |
| 12 | 0.501136000  | -0.765052000 | -1.329525000 |
| 12 | 0.269900000  | -0.927880000 | 1.396910000  |
| 8  | 1.761091000  | -0.435802000 | 2.492326000  |
| 8  | 0.179218000  | -2.250306000 | 0.012385000  |
| 12 | 1.923150000  | -2.928335000 | -0.399990000 |
| 8  | 3.575899000  | -2.595961000 | 0.520486000  |
| 12 | 3.396557000  | -1.248221000 | 1.878443000  |
| 12 | 0.940807000  | 1.931651000  | -1.127694000 |
| 8  | 2.465663000  | 2.559991000  | -0.149982000 |
| 8  | 0.884582000  | 0.743286000  | -2.627964000 |
| 12 | 4.060210000  | 1.630200000  | -0.665954000 |
| 12 | 2.608978000  | -0.044059000 | -2.946933000 |
| 8  | 4.276729000  | 0.391562000  | -2.117334000 |
| 1  | 0.509932000  | 0.435565000  | 5.087539000  |
| 1  | 0.854873000  | 0.198456000  | 4.450026000  |
| 1  | 1.953025000  | 2.346146000  | 3.131847000  |
| 1  | 2.111243000  | 2.896755000  | 2.633974000  |
| 1  | 2.970329000  | 5.332634000  | 0.806991000  |
| 1  | 2.839786000  | 4.626393000  | 0.548425000  |
| 1  | 3.782865000  | -1.711112000 | 4.286005000  |
| 1  | 3.142732000  | -1.325810000 | 4.122247000  |
| 1  | 5.391563000  | -4.889897000 | -0.143859000 |
| 1  | 4.938221000  | -4.315129000 | 0.070105000  |
| 1  | 0.476191000  | 4.095725000  | -0.932695000 |
| 1  | -0.169616000 | 3.992599000  | -1.321835000 |
| 1  | 2.077910000  | 1.380331000  | -4.678631000 |
| 1  | 2.751038000  | 1.318522000  | -5.029303000 |
| 1  | 2.257996000  | -4.837504000 | 0.868835000  |
| 1  | 1.539477000  | -5.047733000 | 0.742374000  |
| 1  | 2.219264000  | -4.076237000 | -2.312720000 |
| 1  | 2.081402000  | -4.760973000 | -2.010217000 |
| 1  | 2.516490000  | -1.836059000 | -4.314331000 |
| 1  | 2.698577000  | -1.450422000 | -4.944717000 |
| 1  | 5.746727000  | -2.162872000 | 2.622358000  |
| 1  | 5.400130000  | -2.508366000 | 2.038364000  |
| 1  | 6.049063000  | -2.063206000 | -1.454227000 |
| 1  | 5.929117000  | -1.429512000 | -1.859500000 |
| 1  | 5.740796000  | 1.802433000  | 0.832455000  |
| 1  | 6.078075000  | 2.406718000  | 0.512325000  |

|   |              |              |              |
|---|--------------|--------------|--------------|
| 1 | 5.367780000  | 3.231568000  | -2.039829000 |
| 1 | 5.288975000  | 2.538734000  | -2.350426000 |
| 1 | -1.716669000 | -1.405065000 | 2.532151000  |
| 1 | -1.668709000 | -1.876379000 | 1.937508000  |
| 1 | -1.348437000 | -3.838456000 | -0.127041000 |
| 1 | -1.867517000 | -4.396170000 | -0.178324000 |
| 1 | -1.411323000 | -1.711117000 | -2.162460000 |
| 1 | -1.346524000 | -1.162905000 | -2.683604000 |
| 1 | -0.726767000 | 1.078522000  | -4.117220000 |
| 1 | -1.299541000 | 1.181168000  | -4.610723000 |

**(MgO)<sub>10</sub>-(H<sub>2</sub>)<sub>18</sub>**

|    |              |              |              |
|----|--------------|--------------|--------------|
| 8  | 2.515069000  | 1.686204000  | -1.112904000 |
| 8  | -0.964127000 | 2.780076000  | -1.198936000 |
| 8  | 2.564909000  | -1.955699000 | -0.413041000 |
| 8  | -3.261043000 | -0.053259000 | -0.540084000 |
| 8  | -0.933066000 | -2.798538000 | -0.133331000 |
| 12 | -2.501119000 | -1.749019000 | -0.142171000 |
| 12 | 0.957525000  | -2.914530000 | -0.085204000 |
| 12 | 0.936714000  | 2.747315000  | -1.150010000 |
| 12 | -2.415566000 | 1.630206000  | -0.780275000 |
| 12 | 2.931833000  | -0.112004000 | -0.661616000 |
| 12 | 2.481572000  | 2.015993000  | 0.907353000  |
| 12 | -0.839312000 | 3.080785000  | 0.822941000  |
| 12 | 2.539347000  | -1.525383000 | 1.571711000  |
| 12 | -3.071911000 | 0.312987000  | 1.470105000  |
| 12 | -0.829787000 | -2.357971000 | 1.863589000  |
| 8  | -2.510002000 | -1.457349000 | 1.865485000  |
| 8  | 1.052184000  | -2.647580000 | 1.943302000  |
| 8  | 1.044297000  | 3.243920000  | 0.814750000  |
| 8  | -2.394268000 | 2.069566000  | 1.204137000  |
| 8  | 3.077631000  | 0.273056000  | 1.337793000  |
| 1  | 1.942850000  | 4.428683000  | -2.524702000 |
| 1  | 2.429782000  | 3.856409000  | -2.403815000 |
| 1  | -0.365082000 | 2.569112000  | -3.499084000 |
| 1  | 0.059759000  | 2.470002000  | -4.121494000 |
| 1  | -0.198490000 | -0.692540000 | -1.583478000 |
| 1  | -0.078225000 | -0.011704000 | -1.896915000 |
| 1  | 0.235836000  | -4.121369000 | -1.900261000 |
| 1  | 0.945115000  | -4.248628000 | -2.144823000 |
| 1  | -1.669530000 | 5.389919000  | 0.426894000  |
| 1  | -1.599747000 | 4.989448000  | -0.216370000 |
| 1  | -0.298329000 | 0.494470000  | 1.944728000  |
| 1  | 0.436026000  | 0.292972000  | 1.949849000  |
| 1  | -1.044589000 | -1.531976000 | 4.197834000  |
| 1  | -0.333210000 | -1.785533000 | 4.256606000  |
| 1  | 1.796993000  | -4.468737000 | 4.237019000  |
| 1  | 1.608841000  | -4.010131000 | 3.657883000  |
| 1  | 4.291127000  | 3.092135000  | 0.006930000  |

|   |              |              |              |
|---|--------------|--------------|--------------|
| 1 | 4.525511000  | 3.374209000  | 0.673259000  |
| 1 | 4.911817000  | -0.309214000 | -1.917030000 |
| 1 | 4.671376000  | 0.404610000  | -2.016045000 |
| 1 | 4.524454000  | -2.915682000 | 1.824907000  |
| 1 | 4.281355000  | -2.888417000 | 1.103157000  |
| 1 | -5.573724000 | 0.322493000  | 1.447546000  |
| 1 | -5.254047000 | 0.208585000  | 0.764881000  |
| 1 | -3.924279000 | 0.999881000  | 3.667103000  |
| 1 | -3.625248000 | 1.587265000  | 3.285530000  |
| 1 | -4.963372000 | -0.425849000 | -1.989353000 |
| 1 | -5.534829000 | -0.557656000 | -2.475907000 |
| 1 | -4.212336000 | 2.351839000  | -2.038715000 |
| 1 | -3.719549000 | 2.912574000  | -2.172859000 |
| 1 | 1.552955000  | -4.832972000 | 1.044228000  |
| 1 | 1.630244000  | -5.275271000 | 0.428793000  |
| 1 | -1.369893000 | -4.380172000 | 2.964353000  |
| 1 | -2.031115000 | -4.010897000 | 2.936499000  |
| 1 | -4.180528000 | -2.963350000 | 0.787929000  |
| 1 | -4.412900000 | -3.257929000 | 0.125312000  |

**Table S3.** XYZ Coordinates of the  $(\text{MgO})_n$ ,  $n=1-10$  clusters with  $\text{H}_2$  molecules optimized at a def2-TZVP/BP86 level theory.

**$\text{MgO}-(\text{H}_2)_9$**

|    |              |              |              |
|----|--------------|--------------|--------------|
| 12 | -1.035636000 | 1.492429000  | -2.355343000 |
| 8  | 0.208554000  | 1.563194000  | -1.124599000 |
| 1  | 0.353079000  | 0.819397000  | 1.802637000  |
| 1  | 0.336273000  | 1.014752000  | 1.067354000  |
| 1  | 2.111740000  | 2.767396000  | -1.595195000 |
| 1  | 2.722263000  | 3.175791000  | -1.797017000 |
| 1  | -1.295189000 | 3.693951000  | -3.205398000 |
| 1  | -1.847197000 | 3.554030000  | -3.709260000 |
| 1  | 1.692348000  | -0.235086000 | -1.352805000 |
| 1  | 2.128574000  | -0.847488000 | -1.472873000 |
| 1  | -2.909755000 | 0.517770000  | -3.579360000 |
| 1  | -2.543518000 | 0.864469000  | -4.145156000 |
| 1  | 0.571990000  | 1.260343000  | -4.093774000 |
| 1  | 0.203057000  | 1.250167000  | -4.761102000 |
| 1  | -1.873215000 | -0.918092000 | -1.548492000 |
| 1  | -1.291914000 | -0.506706000 | -1.257170000 |
| 1  | -2.650419000 | 1.987699000  | -0.812211000 |
| 1  | -3.294155000 | 2.009139000  | -1.223497000 |
| 1  | -0.664942000 | 4.328366000  | 0.103031000  |
| 1  | -0.384848000 | 3.664014000  | -0.143624000 |

**$(\text{MgO})_2-(\text{H}_2)_{13}$**

|    |              |              |             |
|----|--------------|--------------|-------------|
| 12 | -1.154657000 | -0.590635000 | 0.690869000 |
|----|--------------|--------------|-------------|

|    |              |              |              |
|----|--------------|--------------|--------------|
| 12 | 0.907082000  | -1.181130000 | -0.530666000 |
| 8  | -0.577466000 | -0.129684000 | -1.057987000 |
| 8  | 0.328539000  | -1.647175000 | 1.213551000  |
| 1  | 2.310952000  | -0.459131000 | -2.367344000 |
| 1  | 1.626478000  | -0.119149000 | -2.350837000 |
| 1  | 2.103756000  | -1.948374000 | 2.734877000  |
| 1  | 2.735838000  | -2.021759000 | 3.151219000  |
| 1  | -0.801225000 | -2.451474000 | 3.937549000  |
| 1  | -0.422201000 | -2.317267000 | 3.290309000  |
| 1  | -2.546633000 | -1.378707000 | 2.393140000  |
| 1  | -3.056297000 | -0.919756000 | 2.067381000  |
| 1  | 2.550233000  | -0.249354000 | 0.803689000  |
| 1  | 2.962657000  | 0.061866000  | 0.244426000  |
| 1  | -1.449770000 | 0.187349000  | -3.175740000 |
| 1  | -1.725790000 | 0.250668000  | -3.882237000 |
| 1  | 2.208316000  | -2.893518000 | 0.000180000  |
| 1  | 2.617856000  | -2.869577000 | -0.644699000 |
| 1  | -2.656885000 | -1.376810000 | -0.936320000 |
| 1  | -0.796937000 | 1.030138000  | 2.577829000  |
| 1  | -0.300704000 | 0.452144000  | 2.526788000  |
| 1  | 0.432627000  | -2.887995000 | -2.384974000 |
| 1  | -0.050183000 | -2.301089000 | -2.322684000 |
| 1  | -0.165215000 | -4.000482000 | 1.121535000  |
| 1  | -0.329193000 | -4.736333000 | 1.025255000  |
| 1  | -2.780516000 | 1.241829000  | 0.511195000  |
| 1  | -3.210139000 | -1.728415000 | -0.542588000 |
| 1  | -2.303530000 | 1.143571000  | -0.083290000 |
| 1  | 0.043104000  | 2.098336000  | -1.472874000 |
| 1  | 0.281036000  | 2.814737000  | -1.569059000 |

**(MgO)<sub>3</sub>-(H<sub>2</sub>)<sub>12</sub>**

|    |              |              |              |
|----|--------------|--------------|--------------|
| 12 | 0.332744000  | 1.310201000  | 0.750224000  |
| 12 | -1.071773000 | 0.029295000  | -1.560703000 |
| 12 | -0.463971000 | -1.577396000 | 0.891529000  |
| 8  | 0.383548000  | -0.207494000 | 1.814749000  |
| 8  | -0.327544000 | 1.621672000  | -0.960835000 |
| 8  | -1.279083000 | -1.646067000 | -0.776762000 |
| 1  | -0.949229000 | 1.633353000  | -3.203147000 |
| 1  | -1.262564000 | 1.256922000  | -3.790469000 |
| 1  | -3.157828000 | -0.670290000 | -2.208447000 |
| 1  | -3.335075000 | -0.040007000 | -2.596569000 |
| 1  | -2.719878000 | -3.339784000 | -1.678376000 |
| 1  | -3.179246000 | -3.868399000 | -1.969918000 |
| 1  | -0.451513000 | 4.545934000  | -2.017482000 |
| 1  | -0.426838000 | 3.826848000  | -1.774314000 |
| 1  | -0.901967000 | 3.255117000  | 1.680582000  |
| 1  | -1.008092000 | 3.157866000  | 0.932593000  |
| 1  | 1.507891000  | 2.368327000  | 2.744798000  |
| 1  | 1.319634000  | 1.626031000  | 2.785276000  |
| 1  | -0.872511000 | -1.764696000 | 3.121391000  |

|   |              |              |              |
|---|--------------|--------------|--------------|
| 1 | -1.302601000 | -2.396416000 | 3.104599000  |
| 1 | -0.707636000 | -4.083014000 | 1.002659000  |
| 1 | -0.969579000 | -3.759402000 | 0.363250000  |
| 1 | 1.741614000  | -2.891976000 | 1.435609000  |
| 1 | 1.678116000  | -2.160377000 | 1.647644000  |
| 1 | -0.322519000 | -1.647843000 | -2.989112000 |
| 1 | -0.126507000 | -1.234831000 | -3.600368000 |
| 1 | -3.995457000 | -1.413354000 | 1.175083000  |
| 1 | -3.466349000 | -1.502472000 | 0.641264000  |
| 1 | 2.457238000  | 2.464804000  | 0.125249000  |
| 1 | 1.940453000  | 2.415873000  | -0.433875000 |

**(MgO)<sub>4</sub>-(H<sub>2</sub>)<sub>14</sub>**

|    |              |              |              |
|----|--------------|--------------|--------------|
| 12 | -1.583211000 | -0.102284000 | -1.919247000 |
| 12 | 0.605026000  | -0.933142000 | 1.958509000  |
| 12 | -0.179516000 | -2.636924000 | -0.606549000 |
| 12 | -0.773095000 | 1.630965000  | 0.641546000  |
| 8  | 0.609976000  | -2.530777000 | 1.046076000  |
| 8  | 0.157380000  | 0.850836000  | 2.025232000  |
| 8  | -1.600204000 | 1.492083000  | -0.998536000 |
| 8  | -1.097396000 | -1.875637000 | -2.001126000 |
| 1  | -0.993652000 | 0.716369000  | -4.061574000 |
| 1  | -0.850600000 | -0.027514000 | -4.108026000 |
| 1  | -3.527697000 | -0.818699000 | -2.911105000 |
| 1  | -3.767707000 | -0.101496000 | -2.846547000 |
| 1  | -1.689992000 | -3.721123000 | -4.398482000 |
| 1  | -1.549655000 | -3.258080000 | -3.812507000 |
| 1  | 0.356743000  | -4.842205000 | -0.877273000 |
| 1  | -0.005343000 | -4.728926000 | -1.534873000 |
| 1  | 1.974826000  | -5.033799000 | 2.205933000  |
| 1  | 1.639963000  | -4.413928000 | 1.920891000  |
| 1  | 2.661325000  | -0.607217000 | 3.020572000  |
| 1  | 2.738226000  | -1.331693000 | 2.809292000  |
| 1  | -0.086332000 | -2.222082000 | 3.753433000  |
| 1  | -0.199362000 | -1.562414000 | 4.111725000  |
| 1  | -0.541248000 | 1.576884000  | 5.008948000  |
| 1  | -0.378191000 | 1.421374000  | 4.284235000  |
| 1  | 2.558565000  | 2.659010000  | 2.955718000  |
| 1  | 1.976013000  | 2.218288000  | 2.749022000  |
| 1  | 0.688040000  | 3.496883000  | 0.542373000  |
| 1  | 0.277351000  | 3.591717000  | -0.087855000 |
| 1  | -3.807788000 | 3.654765000  | -1.650208000 |
| 1  | -3.272522000 | 3.137308000  | -1.506416000 |
| 1  | -0.636871000 | 3.093787000  | -2.617506000 |
| 1  | -0.304100000 | 3.542677000  | -3.129814000 |
| 1  | -4.534276000 | 0.598108000  | 0.590520000  |
| 1  | -3.949005000 | 0.866384000  | 0.195217000  |
| 1  | -1.807689000 | 2.926861000  | 2.244329000  |
| 1  | -2.215721000 | 3.203267000  | 1.667567000  |

**(MgO)<sub>5</sub>-(H<sub>2</sub>)<sub>15</sub>**

|    |              |              |              |
|----|--------------|--------------|--------------|
| 12 | 3.619337000  | -0.082667000 | -1.799565000 |
| 12 | -1.608632000 | 0.550759000  | -0.873318000 |
| 12 | 3.300838000  | 0.820390000  | 1.376199000  |
| 12 | 0.608010000  | -0.292674000 | -3.194630000 |
| 12 | 0.050852000  | 1.214718000  | 1.949006000  |
| 8  | -1.429267000 | 1.045758000  | 0.882826000  |
| 8  | 2.440232000  | -0.390586000 | -3.163849000 |
| 8  | -1.079085000 | 0.019507000  | -2.547910000 |
| 8  | 1.828798000  | 1.203310000  | 2.398489000  |
| 8  | 4.230142000  | 0.333960000  | -0.127157000 |
| 1  | 0.225857000  | -2.506514000 | -4.138901000 |
| 1  | 0.975920000  | -2.393788000 | -4.099204000 |
| 1  | -2.528490000 | -1.671655000 | -3.486993000 |
| 1  | -2.968514000 | -2.223115000 | -3.766106000 |
| 1  | -3.476580000 | -0.711534000 | -0.240955000 |
| 1  | -3.425480000 | -0.956689000 | -0.956788000 |
| 1  | 3.504745000  | -0.265255000 | -5.267325000 |
| 1  | 3.849959000  | -0.216882000 | -5.942119000 |
| 1  | 5.770253000  | -0.467910000 | -2.525941000 |
| 1  | 5.393609000  | -0.609580000 | -3.169578000 |
| 1  | 7.239270000  | -0.268811000 | 0.329043000  |
| 1  | 6.502306000  | -0.119393000 | 0.220373000  |
| 1  | 4.025449000  | -0.272636000 | 3.294163000  |
| 1  | 4.625198000  | -0.478328000 | 2.877327000  |
| 1  | 2.478575000  | 2.601104000  | 5.105542000  |
| 1  | 2.321010000  | 2.260312000  | 4.445231000  |
| 1  | -0.776064000 | -0.041662000 | 3.851701000  |
| 1  | -0.031165000 | 0.057946000  | 3.959938000  |
| 1  | -4.136527000 | 1.287586000  | 2.415311000  |
| 1  | -3.474530000 | 1.231318000  | 2.047287000  |
| 1  | 4.973258000  | 2.424377000  | 1.638063000  |
| 1  | 4.527538000  | 2.684818000  | 2.193957000  |
| 1  | -0.450722000 | 3.120979000  | 3.280643000  |
| 1  | -1.086229000 | 3.015276000  | 2.880111000  |
| 1  | 0.749371000  | 0.374358000  | -5.427821000 |
| 1  | 0.009100000  | 0.500865000  | -5.322318000 |
| 1  | -3.110869000 | 2.313576000  | -0.865226000 |
| 1  | -3.184633000 | 2.203058000  | -1.612496000 |
| 1  | -2.820424000 | 1.622393000  | -4.654935000 |
| 1  | -2.418922000 | 1.210858000  | -4.159675000 |

**(MgO)<sub>6</sub>-(H<sub>2</sub>)<sub>17</sub>**

|    |              |              |              |
|----|--------------|--------------|--------------|
| 12 | 0.232301000  | -1.994468000 | -0.640178000 |
| 12 | 0.724490000  | -0.599944000 | 2.214380000  |
| 12 | 2.351977000  | -0.526592000 | 0.071168000  |
| 12 | -1.762641000 | 0.311231000  | 0.362946000  |



|    |              |              |              |
|----|--------------|--------------|--------------|
| 12 | 0.356988000  | 1.804945000  | 1.069028000  |
| 12 | -0.134324000 | 0.400311000  | -1.781277000 |
| 8  | 1.968881000  | 0.797804000  | 1.424047000  |
| 8  | -0.690645000 | 1.772705000  | -0.547561000 |
| 8  | 1.438937000  | -0.710748000 | -1.617601000 |
| 8  | -1.383314000 | -1.008771000 | -1.001930000 |
| 8  | 1.273997000  | -1.989347000 | 0.982130000  |
| 8  | -0.850403000 | 0.506322000  | 2.056643000  |
| 1  | -3.885253000 | -0.788601000 | 1.052703000  |
| 1  | -3.613995000 | -1.121478000 | 0.426791000  |
| 1  | -1.738052000 | -0.182729000 | -3.327611000 |
| 1  | -1.508388000 | 0.311408000  | -3.859332000 |
| 1  | 1.326572000  | 1.070046000  | -3.465649000 |
| 1  | 0.889092000  | 1.650444000  | -3.688327000 |
| 1  | 0.188828000  | -4.247763000 | -1.235959000 |
| 1  | -0.453975000 | -4.007084000 | -1.556823000 |
| 1  | 4.339384000  | -2.033898000 | 0.335140000  |
| 1  | 3.688346000  | -2.327280000 | 0.600325000  |
| 1  | 2.197993000  | -0.252834000 | 4.296273000  |
| 1  | 2.384701000  | 0.153565000  | 3.678134000  |
| 1  | -0.388356000 | 3.575438000  | 2.657187000  |
| 1  | -0.698546000 | 2.894856000  | 2.798055000  |
| 1  | -1.208735000 | 4.579531000  | -1.847177000 |
| 1  | -1.087828000 | 3.900087000  | -1.530235000 |
| 1  | -3.092845000 | 2.062896000  | -0.318166000 |
| 1  | -3.755307000 | 1.779884000  | -0.069019000 |
| 1  | 4.178771000  | 0.919566000  | 0.213131000  |
| 1  | 4.576641000  | 0.617673000  | -0.360812000 |
| 1  | 2.702274000  | -1.614843000 | -3.405409000 |
| 1  | 3.107869000  | -1.916516000 | -3.972289000 |
| 1  | -3.588193000 | -2.782623000 | -2.347232000 |
| 1  | -3.061839000 | -2.340877000 | -2.023416000 |
| 1  | 2.175019000  | 3.289028000  | 1.221323000  |
| 1  | 1.798604000  | 3.926752000  | 1.047011000  |
| 1  | -3.803403000 | 1.310552000  | 3.199298000  |
| 1  | -3.088101000 | 1.113161000  | 3.047274000  |
| 1  | -0.994370000 | 0.190346000  | 5.290734000  |
| 1  | -1.069198000 | 0.307913000  | 4.545983000  |
| 1  | 1.768953000  | -4.244470000 | 1.612543000  |
| 1  | 1.905632000  | -4.967758000 | 1.798850000  |
| 1  | 0.234481000  | -2.227372000 | 4.010194000  |
| 1  | 0.533844000  | -2.576073000 | 3.405131000  |

**(MgO)<sub>7</sub>-(H<sub>2</sub>)<sub>16</sub>**

|    |              |              |              |
|----|--------------|--------------|--------------|
| 12 | 0.868576000  | -0.188366000 | 1.117660000  |
| 12 | -0.367788000 | -2.472026000 | 0.471498000  |
| 12 | 0.524765000  | -1.264993000 | -1.742660000 |
| 12 | -1.933025000 | -0.386738000 | -0.128375000 |
| 12 | -0.508269000 | 2.540599000  | 0.018771000  |
| 12 | -0.808845000 | 1.623368000  | -2.437874000 |

|    |              |              |              |
|----|--------------|--------------|--------------|
| 12 | 1.600612000  | 1.788812000  | -1.372616000 |
| 8  | 1.376265000  | -1.719730000 | -0.020533000 |
| 8  | 1.143860000  | 1.607826000  | 0.546644000  |
| 8  | 0.772747000  | 0.435808000  | -2.557531000 |
| 8  | -0.937467000 | -0.899369000 | 1.499837000  |
| 8  | 0.212641000  | 3.118744000  | -1.711418000 |
| 8  | -1.258854000 | -1.910778000 | -1.187908000 |
| 8  | -1.897072000 | 1.392683000  | -0.799854000 |
| 1  | -3.727824000 | -0.879808000 | 1.285979000  |
| 1  | -4.209129000 | -0.729219000 | 0.720101000  |
| 1  | -2.011917000 | 3.365141000  | 1.749091000  |
| 1  | -2.378907000 | 2.897375000  | 1.275413000  |
| 1  | -0.123550000 | 4.798190000  | -0.144239000 |
| 1  | -0.304061000 | 5.026544000  | 0.564316000  |
| 1  | 0.525137000  | 5.006892000  | -3.015176000 |
| 1  | 0.628774000  | 5.620928000  | -3.452352000 |
| 1  | 2.967823000  | 1.287997000  | -3.147852000 |
| 1  | 3.547167000  | 1.742752000  | -2.950396000 |
| 1  | 1.410804000  | -4.038714000 | 0.533401000  |
| 1  | 1.059141000  | -4.687083000 | 0.731187000  |
| 1  | -0.778200000 | -3.774883000 | 2.678170000  |
| 1  | -0.924701000 | -3.026124000 | 2.677229000  |
| 1  | -0.338194000 | 1.092361000  | -4.619511000 |
| 1  | -0.920891000 | 1.473506000  | -4.930195000 |
| 1  | 2.204483000  | -0.081403000 | 3.164668000  |
| 1  | 2.220838000  | 0.597024000  | 2.825856000  |
| 1  | -2.037410000 | -0.250377000 | 4.325246000  |
| 1  | -1.766780000 | -0.407350000 | 3.632120000  |
| 1  | -3.031483000 | 2.133980000  | -2.787761000 |
| 1  | -2.983045000 | 2.306009000  | -3.529308000 |
| 1  | -1.821920000 | -4.104737000 | -0.342775000 |
| 1  | -1.733608000 | -4.646774000 | 0.187433000  |
| 1  | 3.281989000  | 2.578551000  | 0.000369000  |
| 1  | 3.785087000  | 2.762072000  | -0.542548000 |
| 1  | -2.817141000 | -2.695457000 | -2.769193000 |
| 1  | -3.324261000 | -2.946357000 | -3.276746000 |
| 1  | 0.263209000  | -3.036350000 | -3.255701000 |
| 1  | 0.952735000  | -2.886231000 | -3.532239000 |
| 1  | 3.660534000  | -2.259595000 | -0.091300000 |
| 1  | 4.402287000  | -2.423604000 | -0.120271000 |

**(MgO)<sub>8</sub>-(H<sub>2</sub>)<sub>16</sub>**

|    |              |              |              |
|----|--------------|--------------|--------------|
| 12 | -0.019547000 | 0.138775000  | -0.147826000 |
| 8  | -0.012661000 | -1.090717000 | -1.640334000 |
| 8  | 1.901381000  | -0.194095000 | 0.336900000  |
| 12 | 1.825014000  | -1.562628000 | -1.024963000 |
| 8  | -0.682912000 | -0.385070000 | 1.589096000  |
| 12 | -1.820469000 | -1.905535000 | 1.771952000  |
| 8  | -1.887850000 | -3.246070000 | 0.291269000  |
| 12 | -0.530401000 | -2.846981000 | -0.985486000 |

|    |              |              |              |
|----|--------------|--------------|--------------|
| 8  | 1.352138000  | -3.394181000 | -0.582911000 |
| 12 | -1.602539000 | -4.575482000 | 1.665100000  |
| 8  | 0.177711000  | -5.150951000 | 2.147307000  |
| 12 | 1.448655000  | -4.008069000 | 1.225770000  |
| 8  | -1.759988000 | -3.254809000 | 3.164977000  |
| 12 | 1.196291000  | -0.928270000 | 1.994210000  |
| 8  | 1.519747000  | -2.667506000 | 2.702685000  |
| 12 | 0.090501000  | -3.684197000 | 3.513998000  |
| 1  | 3.374981000  | 0.360478000  | -1.533929000 |
| 1  | 3.642543000  | 0.256865000  | -2.238083000 |
| 1  | 3.806350000  | 1.021585000  | 1.196638000  |
| 1  | 4.383406000  | 1.401692000  | 1.509802000  |
| 1  | 3.593119000  | -4.154981000 | 2.117681000  |
| 1  | 3.792134000  | -4.701473000 | 1.629416000  |
| 1  | 0.846870000  | -5.305386000 | 5.214739000  |
| 1  | 0.765339000  | -5.612767000 | 4.522097000  |
| 1  | -0.085360000 | -0.360714000 | -3.890466000 |
| 1  | -0.092837000 | -0.128821000 | -4.613802000 |
| 1  | -1.111828000 | -2.962680000 | -3.219286000 |
| 1  | -1.318666000 | -3.688067000 | -3.136479000 |
| 1  | 1.075970000  | -8.143434000 | 2.380300000  |
| 1  | 0.861236000  | -7.417619000 | 2.316366000  |
| 1  | -3.414828000 | -4.937338000 | 3.034042000  |
| 1  | -3.708107000 | -5.552025000 | 2.686763000  |
| 1  | -3.951776000 | -1.714684000 | 0.842490000  |
| 1  | -4.145292000 | -1.162887000 | 1.326818000  |
| 1  | 0.565437000  | 2.556564000  | -0.318321000 |
| 1  | 1.148340000  | 2.108376000  | -0.117040000 |
| 1  | 1.374902000  | 0.674568000  | 3.869515000  |
| 1  | 0.686774000  | 0.726494000  | 3.553227000  |
| 1  | -0.383281000 | -2.921384000 | 5.891213000  |
| 1  | -0.974431000 | -2.901572000 | 5.408109000  |
| 1  | 3.155559000  | -2.915463000 | -2.297877000 |
| 1  | 3.522009000  | -2.331793000 | -2.620429000 |
| 1  | 1.875967000  | -5.377705000 | -1.985370000 |
| 1  | 2.035561000  | -5.979135000 | -2.416908000 |
| 1  | -1.494394000 | -6.760668000 | 0.945564000  |
| 1  | -2.193205000 | -6.747532000 | 0.646251000  |
| 1  | -1.802695000 | 1.489412000  | -1.268734000 |
| 1  | -1.565083000 | 0.901475000  | -1.689956000 |

**(MgO)<sub>9</sub>-(H<sub>2</sub>)<sub>17</sub>**

|    |             |              |              |
|----|-------------|--------------|--------------|
| 8  | 0.376904000 | 0.611797000  | 0.181582000  |
| 12 | 2.112731000 | 1.105607000  | 1.206317000  |
| 8  | 3.964373000 | 0.302702000  | 0.721455000  |
| 12 | 4.016059000 | -1.033972000 | -0.868075000 |
| 8  | 2.333357000 | -1.592462000 | -1.957728000 |
| 12 | 0.527658000 | -0.734019000 | -1.389146000 |
| 12 | 0.300902000 | -0.964959000 | 1.349314000  |

|    |             |             |             |
|----|-------------|-------------|-------------|
| 8  | 1.78760000  | -0.46366700 | 2.46185900  |
| 8  | 0.24473100  | -2.26156100 | -0.07041300 |
| 12 | 2.00797800  | -2.88703900 | -0.51144600 |
| 8  | 3.65118200  | -2.55478200 | 0.43241400  |
| 12 | 3.43428300  | -1.23861300 | 1.82112800  |
| 12 | 0.92615100  | 1.97736900  | -1.11920300 |
| 8  | 2.44105100  | 2.61071800  | -0.11806600 |
| 8  | 0.89247200  | 0.81610100  | -2.65248200 |
| 12 | 4.06146100  | 1.72136200  | -0.65351800 |
| 12 | 2.63581300  | 0.06480500  | -2.99278400 |
| 8  | 4.29700100  | 0.51880500  | -2.13997700 |
| 1  | 0.71103700  | -0.13085000 | 5.38496000  |
| 1  | 0.99076500  | -0.21287900 | 4.68351800  |
| 1  | 1.92188400  | 2.32732500  | 3.24282200  |
| 1  | 2.04982300  | 2.91046800  | 2.77566000  |
| 1  | 2.70217200  | 5.64274300  | 0.50862200  |
| 1  | 2.64657700  | 4.89950500  | 0.35933100  |
| 1  | 4.21566200  | -1.67973600 | 4.08116900  |
| 1  | 3.54449600  | -1.32018000 | 4.08225100  |
| 1  | 4.47784900  | -5.62362500 | 0.55943900  |
| 1  | 4.34780700  | -4.87617200 | 0.55576000  |
| 1  | 0.12815500  | 4.12534300  | -1.06054300 |
| 1  | -0.43831700 | 3.87945000  | -1.50086200 |
| 1  | 2.09140700  | 1.44708000  | -4.85074500 |
| 1  | 2.76695600  | 1.38318100  | -5.19185400 |
| 1  | 2.05800800  | -4.56054700 | -2.11666400 |
| 1  | 1.91250700  | -5.04923700 | -1.55705800 |
| 1  | 2.77969200  | -1.76579700 | -4.44950400 |
| 1  | 2.96955200  | -1.37419100 | -5.07210100 |
| 1  | 6.18283900  | -2.63607200 | 2.40099700  |
| 1  | 5.68670900  | -2.80947000 | 1.85396700  |
| 1  | 6.20496700  | -1.97817700 | -1.55389800 |
| 1  | 6.08448500  | -1.33875200 | -1.94598600 |
| 1  | 5.81577600  | 1.99969400  | 0.87082900  |
| 1  | 6.12635100  | 2.61307700  | 0.54690000  |
| 1  | 5.48023600  | 3.40478400  | -2.03683200 |
| 1  | 5.38981500  | 2.71315500  | -2.34230800 |
| 1  | -1.59933000 | -1.35010800 | 2.70574000  |
| 1  | -1.67160500 | -1.84423500 | 2.13517100  |
| 1  | -1.39235300 | -3.94203600 | -0.09340700 |
| 1  | -1.91908700 | -4.49004300 | -0.09474800 |
| 1  | -1.46599800 | -1.67883700 | -2.25924300 |
| 1  | -1.39858000 | -1.12240100 | -2.76981700 |
| 1  | -0.72962000 | 1.44361500  | -4.24571100 |
| 1  | -1.26327700 | 1.65530500  | -4.74344000 |

**(MgO)<sub>10</sub>-(H<sub>2</sub>)<sub>15</sub>**

|   |             |             |             |
|---|-------------|-------------|-------------|
| 8 | 2.41792300  | 1.59020500  | -1.20208000 |
| 8 | -1.08480400 | 2.66891700  | -1.49445900 |
| 8 | 2.45005500  | -1.99935700 | -0.36597800 |

|    |              |              |              |
|----|--------------|--------------|--------------|
| 8  | -3.263925000 | -0.227432000 | -0.844700000 |
| 8  | -1.038121000 | -3.057563000 | -0.165778000 |
| 12 | -2.547737000 | -1.915304000 | -0.325771000 |
| 12 | 0.863340000  | -3.007846000 | -0.059959000 |
| 12 | 0.813027000  | 2.607978000  | -1.344320000 |
| 12 | -2.563276000 | 1.523227000  | -1.127370000 |
| 12 | 2.900521000  | -0.172368000 | -0.669043000 |
| 12 | 2.307889000  | 1.994051000  | 0.799700000  |
| 12 | -1.076789000 | 3.037399000  | 0.516772000  |
| 12 | 2.334939000  | -1.481509000 | 1.602090000  |
| 12 | -3.187790000 | 0.236968000  | 1.160428000  |
| 12 | -1.031225000 | -2.519698000 | 1.798486000  |
| 8  | -2.646800000 | -1.516681000 | 1.667555000  |
| 8  | 0.863376000  | -2.637327000 | 1.963975000  |
| 8  | 0.819201000  | 3.162260000  | 0.618511000  |
| 8  | -2.662152000 | 2.039491000  | 0.838686000  |
| 8  | 2.960084000  | 0.288058000  | 1.316335000  |
| 1  | 1.544206000  | 4.066475000  | -3.107991000 |
| 1  | 2.123709000  | 3.608241000  | -2.931457000 |
| 1  | -1.634586000 | 4.490818000  | -2.946201000 |
| 1  | -1.803765000 | 5.074071000  | -3.401953000 |
| 1  | 0.277650000  | -4.443716000 | -1.847975000 |
| 1  | 0.994510000  | -4.555189000 | -2.073765000 |
| 1  | -0.768415000 | 5.135277000  | 1.355362000  |
| 1  | -1.521659000 | 5.230801000  | 1.391177000  |
| 1  | 1.581729000  | -3.994409000 | 4.744773000  |
| 1  | 1.404566000  | -3.688074000 | 4.073761000  |
| 1  | 4.206064000  | 3.249232000  | 0.175307000  |
| 1  | 4.296373000  | 3.497199000  | 0.885355000  |
| 1  | 4.587482000  | -1.268226000 | -1.770154000 |
| 1  | 4.866490000  | -0.598827000 | -1.996482000 |
| 1  | 4.353596000  | -2.716508000 | 2.367768000  |
| 1  | 4.258842000  | -2.844387000 | 1.627363000  |
| 1  | -5.915909000 | 0.122659000  | 0.902359000  |
| 1  | -5.494493000 | -0.012765000 | 0.285709000  |
| 1  | -4.365945000 | 0.937122000  | 3.257507000  |
| 1  | -4.085099000 | 1.538621000  | 2.887481000  |
| 1  | -4.759902000 | -0.879891000 | -2.656320000 |
| 1  | -5.204682000 | -1.108953000 | -3.226194000 |
| 1  | -4.295898000 | 2.107876000  | -2.596494000 |
| 1  | -3.814074000 | 2.678424000  | -2.725390000 |
| 1  | 1.553413000  | -4.950497000 | 1.199157000  |
| 1  | 1.673922000  | -5.420398000 | 0.615252000  |
| 1  | -1.745557000 | -4.045062000 | 3.514565000  |
| 1  | -2.330171000 | -3.582877000 | 3.367741000  |
| 1  | -4.404581000 | -3.249337000 | 0.274453000  |
| 1  | -4.462305000 | -3.504910000 | -0.435920000 |

**Table S4.** XYZ Coordinates of the (MgO)<sub>n</sub>, n=1-10 clusters with H<sub>2</sub> molecules optimized at a def2-TZVP/ωB97X-D3 level theory.

**MgO-(H<sub>2</sub>)<sub>9</sub>**

|    |              |              |              |
|----|--------------|--------------|--------------|
| 12 | -0.856714000 | 1.702598000  | -2.474180000 |
| 8  | -0.050021000 | 1.367256000  | -0.986812000 |
| 1  | -0.523560000 | 0.980468000  | 1.901859000  |
| 1  | -0.373006000 | 1.072251000  | 1.167125000  |
| 1  | 1.742365000  | 2.791278000  | -1.618308000 |
| 1  | 2.190484000  | 3.295020000  | -1.961425000 |
| 1  | -0.389266000 | 4.017467000  | -3.342271000 |
| 1  | -0.899030000 | 3.887090000  | -3.880146000 |
| 1  | 1.575000000  | -0.023067000 | -1.726212000 |
| 1  | 2.062686000  | -0.504973000 | -2.048695000 |
| 1  | -2.509863000 | -0.056083000 | -3.050388000 |
| 1  | -2.702996000 | 0.372068000  | -3.639021000 |
| 1  | 0.680020000  | 0.881002000  | -4.269369000 |
| 1  | 0.197357000  | 1.153611000  | -4.778652000 |
| 1  | -1.419975000 | -1.432938000 | -0.923639000 |
| 1  | -1.019587000 | -0.795947000 | -0.846391000 |
| 1  | -2.557953000 | 1.463893000  | -0.206576000 |
| 1  | -3.305190000 | 1.535972000  | -0.268348000 |
| 1  | -0.705357000 | 4.273062000  | 0.003878000  |
| 1  | -0.485403000 | 3.563140000  | -0.130213000 |

**(MgO)<sub>2</sub>-(H<sub>2</sub>)<sub>13</sub>**

|    |              |              |              |
|----|--------------|--------------|--------------|
| 12 | -1.120279000 | -0.467699000 | 0.859515000  |
| 12 | 0.790671000  | -1.153495000 | -0.494827000 |
| 8  | -0.620211000 | 0.010971000  | -0.872208000 |
| 8  | 0.284412000  | -1.635143000 | 1.240440000  |
| 1  | 2.111928000  | -0.692131000 | -2.474230000 |
| 1  | 1.498783000  | -0.251542000 | -2.462139000 |
| 1  | 2.003880000  | -1.505762000 | 2.647764000  |
| 1  | 2.636706000  | -1.426709000 | 3.055600000  |
| 1  | -0.709063000 | -2.688842000 | 3.833709000  |
| 1  | -0.369159000 | -2.480738000 | 3.189845000  |
| 1  | -2.518807000 | -1.605479000 | 2.222646000  |
| 1  | -3.055196000 | -1.166380000 | 1.927207000  |
| 1  | 2.516347000  | -0.079183000 | 0.656418000  |
| 1  | 2.750115000  | 0.260317000  | 0.026840000  |
| 1  | -1.201075000 | -0.006971000 | -2.990282000 |
| 1  | -1.340727000 | -0.095586000 | -3.729552000 |
| 1  | 2.204088000  | -2.838373000 | 0.037970000  |
| 1  | 2.568253000  | -2.777230000 | -0.622122000 |
| 1  | -2.784631000 | -1.246854000 | -1.206019000 |
| 1  | -0.824722000 | 0.919494000  | 2.827150000  |
| 1  | -0.328534000 | 0.349994000  | 2.820692000  |
| 1  | 0.167548000  | -2.966777000 | -2.061145000 |
| 1  | -0.305151000 | -2.386265000 | -2.142350000 |
| 1  | -0.178806000 | -3.842752000 | 0.900207000  |
| 1  | -0.306374000 | -4.555675000 | 0.683489000  |
| 1  | -2.778395000 | 1.288873000  | 0.806039000  |

|   |              |              |              |
|---|--------------|--------------|--------------|
| 1 | -3.374582000 | -1.675366000 | -1.018744000 |
| 1 | -2.346320000 | 1.253460000  | 0.181876000  |
| 1 | 0.353696000  | 1.904231000  | -1.511761000 |
| 1 | 0.779092000  | 2.493271000  | -1.725183000 |

**(MgO)<sub>3</sub>-(H<sub>2</sub>)<sub>12</sub>**

|    |              |              |              |
|----|--------------|--------------|--------------|
| 12 | 0.330814000  | 1.399260000  | 0.463172000  |
| 12 | -1.195616000 | -0.149376000 | -1.557131000 |
| 12 | -0.358014000 | -1.445250000 | 0.999051000  |
| 8  | 0.485844000  | 0.037162000  | 1.675160000  |
| 8  | -0.460255000 | 1.486334000  | -1.188802000 |
| 8  | -1.249587000 | -1.706332000 | -0.583477000 |
| 1  | -1.419119000 | 1.801121000  | -3.340282000 |
| 1  | -1.802648000 | 1.592120000  | -3.955648000 |
| 1  | -3.308545000 | -0.854213000 | -2.042176000 |
| 1  | -3.426262000 | -0.246905000 | -2.471723000 |
| 1  | -2.097445000 | -3.346045000 | -1.879462000 |
| 1  | -2.404874000 | -3.831984000 | -2.368579000 |
| 1  | -0.325177000 | 4.432261000  | -1.730004000 |
| 1  | -0.399101000 | 3.682757000  | -1.671122000 |
| 1  | -0.277556000 | 3.297382000  | 1.702871000  |
| 1  | -0.550256000 | 3.457031000  | 1.020360000  |
| 1  | 2.000957000  | 2.182699000  | 3.164546000  |
| 1  | 1.667545000  | 1.542435000  | 2.940371000  |
| 1  | -1.187864000 | -1.297211000 | 3.134074000  |
| 1  | -1.621478000 | -1.906302000 | 3.036703000  |
| 1  | -1.112491000 | -4.101602000 | 1.386305000  |
| 1  | -1.296399000 | -3.754318000 | 0.742569000  |
| 1  | 1.324414000  | -2.960591000 | 1.868936000  |
| 1  | 1.487524000  | -2.247721000 | 2.056019000  |
| 1  | -0.670851000 | -1.562689000 | -3.284207000 |
| 1  | -0.618670000 | -0.952863000 | -3.722412000 |
| 1  | -4.064794000 | -2.242324000 | 0.618463000  |
| 1  | -3.397034000 | -2.142806000 | 0.284562000  |
| 1  | 2.326200000  | 2.636080000  | 0.184157000  |
| 1  | 1.960953000  | 2.690477000  | -0.471861000 |

**(MgO)<sub>4</sub>-(H<sub>2</sub>)<sub>14</sub>**

|    |              |              |              |
|----|--------------|--------------|--------------|
| 12 | -1.385261000 | -0.164235000 | -2.080492000 |
| 12 | 0.631899000  | -1.044168000 | 1.886378000  |
| 12 | -0.189913000 | -2.751303000 | -0.671413000 |
| 12 | -0.540698000 | 1.567199000  | 0.475161000  |
| 8  | 0.537006000  | -2.622393000 | 0.986637000  |
| 8  | 0.288302000  | 0.743923000  | 1.870292000  |
| 8  | -1.310028000 | 1.409950000  | -1.167800000 |
| 8  | -0.995203000 | -1.940339000 | -2.079731000 |
| 1  | -1.018067000 | 0.878197000  | -4.121593000 |
| 1  | -0.955208000 | 0.164642000  | -4.350512000 |

|   |              |              |              |
|---|--------------|--------------|--------------|
| 1 | -3.550567000 | -0.528623000 | -2.894655000 |
| 1 | -3.626134000 | 0.189133000  | -2.683689000 |
| 1 | -2.181784000 | -2.648531000 | -4.745132000 |
| 1 | -1.858114000 | -2.565905000 | -4.068077000 |
| 1 | 0.245127000  | -4.992346000 | -0.820799000 |
| 1 | -0.079207000 | -4.903785000 | -1.493820000 |
| 1 | 1.717173000  | -4.331011000 | 3.160586000  |
| 1 | 1.420698000  | -3.988175000 | 2.556821000  |
| 1 | 2.494117000  | -0.621873000 | 3.182909000  |
| 1 | 2.609890000  | -1.360489000 | 3.100073000  |
| 1 | -0.299842000 | -2.030205000 | 3.816600000  |
| 1 | -0.394070000 | -1.307235000 | 3.999774000  |
| 1 | -0.620332000 | 1.614767000  | 4.612580000  |
| 1 | -0.398297000 | 1.406889000  | 3.921935000  |
| 1 | 2.504405000  | 2.511178000  | 2.907266000  |
| 1 | 1.952129000  | 2.054927000  | 2.670161000  |
| 1 | 0.861569000  | 3.432915000  | 0.526660000  |
| 1 | 0.502792000  | 3.563428000  | -0.121326000 |
| 1 | -3.935796000 | 2.903375000  | -1.344559000 |
| 1 | -3.264153000 | 2.560509000  | -1.320475000 |
| 1 | -0.824687000 | 3.148477000  | -2.538873000 |
| 1 | -0.631577000 | 3.706080000  | -3.009092000 |
| 1 | -3.560978000 | -0.147909000 | 0.852481000  |
| 1 | -3.254878000 | 0.309609000  | 0.344637000  |
| 1 | -1.816476000 | 2.822154000  | 1.964119000  |
| 1 | -2.172789000 | 3.023931000  | 1.333327000  |

**(MgO)<sub>5</sub>-(H<sub>2</sub>)<sub>16</sub>**

|    |              |              |              |
|----|--------------|--------------|--------------|
| 12 | 3.523657000  | -0.278601000 | -1.672339000 |
| 12 | -1.674301000 | 0.616166000  | -0.823335000 |
| 12 | 3.197132000  | 0.735967000  | 1.457333000  |
| 12 | 0.515748000  | -0.384889000 | -3.075795000 |
| 12 | -0.019292000 | 1.305268000  | 1.992076000  |
| 8  | -1.460204000 | 1.060526000  | 0.920220000  |
| 8  | 2.315764000  | -0.594201000 | -2.982358000 |
| 8  | -1.128165000 | 0.093215000  | -2.473525000 |
| 8  | 1.743300000  | 1.245079000  | 2.411990000  |
| 8  | 4.094005000  | 0.172758000  | -0.016006000 |
| 1  | -0.175137000 | -2.659924000 | -3.572028000 |
| 1  | 0.574941000  | -2.703365000 | -3.545821000 |
| 1  | -2.595266000 | -1.268373000 | -3.580178000 |
| 1  | -3.038481000 | -1.762521000 | -3.938237000 |
| 1  | -3.562872000 | -0.757564000 | -0.335078000 |
| 1  | -3.433387000 | -0.938288000 | -1.053129000 |
| 1  | 3.245729000  | -0.819003000 | -5.023860000 |
| 1  | 3.552635000  | -0.886015000 | -5.710114000 |
| 1  | 5.688420000  | -0.620330000 | -2.402772000 |
| 1  | 5.323379000  | -0.779087000 | -3.041174000 |
| 1  | 6.974849000  | -0.178175000 | 0.760065000  |
| 1  | 6.259214000  | -0.096795000 | 0.534334000  |



|   |              |              |              |
|---|--------------|--------------|--------------|
| 1 | 3.921083000  | -0.657631000 | 3.239796000  |
| 1 | 4.407650000  | -0.874382000 | 2.709656000  |
| 1 | 2.245911000  | 2.951792000  | 4.827556000  |
| 1 | 2.141935000  | 2.509386000  | 4.224621000  |
| 1 | -1.064060000 | 0.777309000  | 4.071483000  |
| 1 | -0.334941000 | 0.823642000  | 4.249414000  |
| 1 | -2.311737000 | -1.590553000 | 2.390521000  |
| 1 | -2.171277000 | -0.950972000 | 2.019896000  |
| 1 | 5.036882000  | 2.066096000  | 2.098746000  |
| 1 | 4.542086000  | 2.295439000  | 2.616015000  |
| 1 | -0.226252000 | 3.502964000  | 2.905785000  |
| 1 | -0.880338000 | 3.432924000  | 2.542417000  |
| 1 | 0.503596000  | -1.391974000 | 0.352952000  |
| 1 | 1.044854000  | -1.697961000 | -0.063253000 |
| 1 | 0.516534000  | -0.296696000 | -5.413545000 |
| 1 | -0.186674000 | -0.064968000 | -5.282348000 |
| 1 | -3.331176000 | 2.256261000  | -0.978467000 |
| 1 | -3.311721000 | 2.080506000  | -1.709219000 |
| 1 | -2.522520000 | 1.820557000  | -4.568858000 |
| 1 | -2.181412000 | 1.381836000  | -4.059434000 |

**(MgO)<sub>6</sub>-(H<sub>2</sub>)<sub>17</sub>**

|    |              |              |              |
|----|--------------|--------------|--------------|
| 12 | 0.248729000  | -2.081973000 | -0.613938000 |
| 12 | 0.787655000  | -0.550505000 | 2.176528000  |
| 12 | 2.323920000  | -0.553173000 | 0.004102000  |
| 12 | -1.728309000 | 0.246511000  | 0.361613000  |
| 12 | 0.371213000  | 1.781688000  | 0.950428000  |
| 12 | -0.191048000 | 0.249703000  | -1.812715000 |
| 8  | 1.975221000  | 0.801358000  | 1.293989000  |
| 8  | -0.696676000 | 1.653096000  | -0.623152000 |
| 8  | 1.391776000  | -0.812824000 | -1.644484000 |
| 8  | -1.368564000 | -1.114802000 | -0.933938000 |
| 8  | 1.293436000  | -1.961571000 | 0.982037000  |
| 8  | -0.787665000 | 0.520280000  | 2.004927000  |
| 1  | -3.277855000 | -0.725065000 | 1.898626000  |
| 1  | -3.623489000 | -1.016651000 | 1.298450000  |
| 1  | -2.164170000 | -0.176535000 | -3.093362000 |
| 1  | -2.071881000 | 0.384232000  | -3.587811000 |
| 1  | 0.997992000  | 0.694932000  | -3.762267000 |
| 1  | 0.494227000  | 1.209597000  | -3.981159000 |
| 1  | -0.674466000 | -4.127553000 | -1.541122000 |
| 1  | -1.187513000 | -3.576340000 | -1.576774000 |
| 1  | 3.879272000  | -2.894328000 | 2.342338000  |
| 1  | 3.210799000  | -2.766274000 | 2.018600000  |
| 1  | 2.207296000  | -0.201605000 | 4.197689000  |
| 1  | 2.430890000  | 0.215885000  | 3.609830000  |
| 1  | 0.027235000  | 3.566975000  | 2.578064000  |
| 1  | -0.368485000 | 2.960572000  | 2.784215000  |
| 1  | -1.596179000 | 3.366020000  | -2.934865000 |

|   |              |              |              |
|---|--------------|--------------|--------------|
| 1 | -1.372983000 | 3.029184000  | -2.296793000 |
| 1 | -3.268114000 | 1.734448000  | -0.476565000 |
| 1 | -3.836891000 | 1.317248000  | -0.212170000 |
| 1 | 4.456587000  | -1.456939000 | -0.463686000 |
| 1 | 4.064120000  | -1.519682000 | -1.102055000 |
| 1 | 3.103916000  | 1.033741000  | -2.078356000 |
| 1 | 3.572662000  | 1.576860000  | -1.858681000 |
| 1 | -4.224563000 | -1.927141000 | -1.427330000 |
| 1 | -3.491102000 | -1.769517000 | -1.339579000 |
| 1 | 2.206238000  | 3.241808000  | 0.653234000  |
| 1 | 1.781119000  | 3.805142000  | 0.390099000  |
| 1 | -3.289835000 | 2.139788000  | 2.965170000  |
| 1 | -2.670329000 | 1.728987000  | 2.848153000  |
| 1 | -0.760628000 | 0.371460000  | 5.091282000  |
| 1 | -0.893427000 | 0.471023000  | 4.356200000  |
| 1 | 1.967476000  | -4.023637000 | -0.126294000 |
| 1 | 1.972233000  | -4.501315000 | -0.708434000 |
| 1 | 0.268661000  | -2.180404000 | 3.972625000  |
| 1 | 0.559312000  | -2.542262000 | 3.379648000  |

**(MgO)<sub>7</sub>-(H<sub>2</sub>)<sub>16</sub>**

|    |              |              |              |
|----|--------------|--------------|--------------|
| 12 | 0.884781000  | -0.552440000 | 1.257953000  |
| 12 | -0.388033000 | -2.752526000 | 0.523998000  |
| 12 | 0.540944000  | -1.533885000 | -1.635084000 |
| 12 | -1.917770000 | -0.659762000 | -0.009231000 |
| 12 | -0.446333000 | 2.207361000  | 0.233153000  |
| 12 | -0.739661000 | 1.374131000  | -2.237377000 |
| 12 | 1.645696000  | 1.468378000  | -1.156004000 |
| 8  | 1.354454000  | -2.034605000 | 0.071237000  |
| 8  | 1.167651000  | 1.231654000  | 0.730541000  |
| 8  | 0.806743000  | 0.175088000  | -2.365704000 |
| 8  | -0.924602000 | -1.222366000 | 1.586921000  |
| 8  | 0.290533000  | 2.811987000  | -1.454253000 |
| 8  | -1.249243000 | -2.137093000 | -1.100754000 |
| 8  | -1.825506000 | 1.110920000  | -0.625726000 |
| 1  | -3.469424000 | -1.166215000 | 1.640496000  |
| 1  | -4.049287000 | -1.025852000 | 1.180770000  |
| 1  | -2.471670000 | 3.605750000  | 1.067764000  |
| 1  | -2.653067000 | 3.021810000  | 0.626504000  |
| 1  | 0.242615000  | 4.447457000  | 0.280570000  |
| 1  | 0.085450000  | 4.605672000  | 1.003048000  |
| 1  | -0.241971000 | 4.199547000  | -3.145497000 |
| 1  | -0.503609000 | 4.545354000  | -3.765711000 |
| 1  | 2.947709000  | 1.208902000  | -3.061081000 |
| 1  | 3.478408000  | 1.698441000  | -2.844035000 |
| 1  | 1.273936000  | -4.414714000 | 0.437259000  |
| 1  | 0.839280000  | -5.015627000 | 0.584123000  |
| 1  | -0.733150000 | -4.075402000 | 2.739458000  |
| 1  | -0.885698000 | -3.335945000 | 2.768632000  |

|   |              |              |              |
|---|--------------|--------------|--------------|
| 1 | -0.128710000 | 1.091246000  | -4.463367000 |
| 1 | -0.667593000 | 1.542059000  | -4.736748000 |
| 1 | 2.208192000  | -0.408087000 | 3.278628000  |
| 1 | 2.217070000  | 0.263623000  | 2.939798000  |
| 1 | -1.471731000 | 1.554160000  | 2.939692000  |
| 1 | -1.398312000 | 0.859085000  | 2.654288000  |
| 1 | -2.905090000 | 2.120494000  | -2.629280000 |
| 1 | -2.760207000 | 2.350275000  | -3.332288000 |
| 1 | -2.020644000 | -4.265058000 | -0.261665000 |
| 1 | -1.969377000 | -4.787398000 | 0.282229000  |
| 1 | 3.272524000  | 2.387300000  | 0.243295000  |
| 1 | 3.740364000  | 2.601198000  | -0.308250000 |
| 1 | -2.160099000 | -1.100905000 | -3.051661000 |
| 1 | -2.392554000 | -0.697345000 | -3.645605000 |
| 1 | -0.048705000 | -3.267765000 | -3.058091000 |
| 1 | 0.616105000  | -3.242707000 | -3.410806000 |
| 1 | 3.352759000  | -0.878649000 | -0.514952000 |
| 1 | 3.921962000  | -0.426451000 | -0.718533000 |

**(MgO)<sub>8</sub>-(H<sub>2</sub>)<sub>16</sub>**

|    |              |              |              |
|----|--------------|--------------|--------------|
| 12 | -0.132863000 | 0.202203000  | -0.051826000 |
| 8  | 0.039680000  | -0.984511000 | -1.537837000 |
| 8  | 1.757742000  | 0.015333000  | 0.512871000  |
| 12 | 1.864164000  | -1.313673000 | -0.860926000 |
| 8  | -0.826937000 | -0.398812000 | 1.624546000  |
| 12 | -1.853445000 | -1.981553000 | 1.724492000  |
| 8  | -1.716086000 | -3.284794000 | 0.234866000  |
| 12 | -0.356236000 | -2.783152000 | -0.974604000 |
| 8  | 1.520937000  | -3.161443000 | -0.466848000 |
| 12 | -1.382496000 | -4.597877000 | 1.584020000  |
| 8  | 0.399070000  | -5.014099000 | 2.136026000  |
| 12 | 1.623741000  | -3.787306000 | 1.313614000  |
| 8  | -1.709711000 | -3.331875000 | 3.076876000  |
| 12 | 1.057755000  | -0.762769000 | 2.120694000  |
| 8  | 1.491292000  | -2.473433000 | 2.790323000  |
| 12 | 0.128583000  | -3.609068000 | 3.506891000  |
| 1  | 3.068134000  | 0.899097000  | -1.362505000 |
| 1  | 3.334960000  | 0.843834000  | -2.064760000 |
| 1  | 4.065423000  | -0.991000000 | 0.500826000  |
| 1  | 4.542412000  | -1.495935000 | 0.212326000  |
| 1  | 3.698064000  | -3.722404000 | 2.341182000  |
| 1  | 3.961639000  | -4.247690000 | 1.870864000  |
| 1  | 0.865361000  | -5.116962000 | 5.260186000  |
| 1  | 0.858067000  | -5.479431000 | 4.599159000  |
| 1  | 0.655932000  | -0.323063000 | -3.617036000 |
| 1  | 0.954072000  | -0.139723000 | -4.285982000 |
| 1  | -0.673428000 | -2.716148000 | -3.273015000 |
| 1  | -0.882447000 | -3.438575000 | -3.306006000 |
| 1  | 1.250471000  | -7.819895000 | 2.673595000  |

|   |              |              |              |
|---|--------------|--------------|--------------|
| 1 | 1.046593000  | -7.108562000 | 2.520278000  |
| 1 | -3.208196000 | -5.197576000 | 2.856013000  |
| 1 | -3.376455000 | -5.817331000 | 2.457475000  |
| 1 | -3.815518000 | -1.903470000 | 0.473181000  |
| 1 | -4.107046000 | -1.363322000 | 0.909738000  |
| 1 | 0.225156000  | 2.615876000  | -0.332857000 |
| 1 | 0.849943000  | 2.272686000  | -0.085927000 |
| 1 | 0.801732000  | 0.688427000  | 4.098109000  |
| 1 | 0.155701000  | 0.675438000  | 3.711459000  |
| 1 | -0.344234000 | -2.567856000 | 5.769524000  |
| 1 | -0.960517000 | -2.624729000 | 5.338313000  |
| 1 | 3.111651000  | -2.483834000 | -2.368252000 |
| 1 | 3.370447000  | -1.845963000 | -2.674400000 |
| 1 | 0.759654000  | -5.244162000 | -1.516351000 |
| 1 | 0.273392000  | -5.715724000 | -1.842629000 |
| 1 | -1.009569000 | -6.750954000 | 0.775156000  |
| 1 | -1.683288000 | -6.747979000 | 0.438890000  |
| 1 | -2.152034000 | 1.232162000  | -1.095765000 |
| 1 | -1.844624000 | 0.721888000  | -1.557288000 |

**(MgO)<sub>9</sub>-(H<sub>2</sub>)<sub>18</sub>**

|    |             |              |              |
|----|-------------|--------------|--------------|
| 8  | 0.382673961 | 0.646028243  | 0.222934255  |
| 12 | 2.124933542 | 1.110846358  | 1.216316950  |
| 8  | 3.932870373 | 0.261473736  | 0.728515955  |
| 12 | 3.943485967 | -1.092399422 | -0.826117376 |
| 8  | 2.249915546 | -1.617991802 | -1.871071572 |
| 12 | 0.482147604 | -0.720476597 | -1.316215142 |
| 12 | 0.268494917 | -0.890735948 | 1.407765855  |
| 8  | 1.778373640 | -0.426753612 | 2.469848936  |
| 8  | 0.189807050 | -2.193337529 | 0.021422592  |
| 12 | 1.906537727 | -2.887018587 | -0.418181405 |
| 8  | 3.548869446 | -2.560079479 | 0.495400498  |
| 12 | 3.397313355 | -1.232491659 | 1.855229781  |
| 12 | 0.931770562 | 1.969303409  | -1.091241157 |
| 8  | 2.471366770 | 2.558468877  | -0.135046255 |
| 8  | 0.883540967 | 0.789272267  | -2.583132943 |
| 12 | 4.058819123 | 1.643664226  | -0.656068835 |
| 12 | 2.582115459 | -0.007678529 | -2.937399973 |
| 8  | 4.237595193 | 0.421143534  | -2.107052717 |
| 1  | 0.622674979 | 0.293494431  | 5.135775980  |
| 1  | 0.944491038 | 0.100615383  | 4.479945158  |
| 1  | 2.001660729 | 2.352371719  | 3.203167206  |
| 1  | 2.138095130 | 2.916369615  | 2.724872821  |
| 1  | 2.554313140 | 5.331366771  | 0.938821885  |
| 1  | 2.561953572 | 4.632853257  | 0.649458367  |
| 1  | 4.029999119 | -1.670270356 | 4.214815591  |
| 1  | 3.370097599 | -1.307377651 | 4.175838440  |
| 1  | 5.170842788 | -5.032024143 | -0.029368233 |
| 1  | 4.781568337 | -4.408097460 | 0.143011715  |

|   |              |              |              |
|---|--------------|--------------|--------------|
| 1 | 0.369263403  | 4.170498787  | -0.869483015 |
| 1 | -0.255109840 | 4.018650315  | -1.261468448 |
| 1 | 2.153375095  | 1.425667161  | -4.789048046 |
| 1 | 2.844695630  | 1.310476664  | -5.062112105 |
| 1 | 2.174652615  | -4.888316906 | 0.858804976  |
| 1 | 1.463941758  | -5.069819584 | 0.695171406  |
| 1 | 2.103002830  | -4.127165606 | -2.364572623 |
| 1 | 1.953133327  | -4.777054715 | -2.016509205 |
| 1 | 2.618020367  | -1.851270854 | -4.360385114 |
| 1 | 2.811387181  | -1.455647760 | -4.970642060 |
| 1 | 6.031445712  | -2.227577223 | 2.435888367  |
| 1 | 5.622343782  | -2.553633260 | 1.895439039  |
| 1 | 5.899407390  | -2.336512231 | -1.337871618 |
| 1 | 5.979592345  | -1.726898842 | -1.771020587 |
| 1 | 5.777057285  | 1.942315958  | 0.870262505  |
| 1 | 6.051286523  | 2.554548025  | 0.527954949  |
| 1 | 5.241590522  | 3.405524612  | -2.027723219 |
| 1 | 5.229757180  | 2.743476727  | -2.386538267 |
| 1 | -1.641339390 | -1.334578718 | 2.712046655  |
| 1 | -1.692070629 | -1.806497139 | 2.128529856  |
| 1 | -1.434861972 | -3.695935937 | -0.176042230 |
| 1 | -1.985695892 | -4.207916923 | -0.253349451 |
| 1 | -1.468738633 | -1.664008433 | -2.188752454 |
| 1 | -1.381265246 | -1.130815131 | -2.711876075 |
| 1 | -0.458248471 | 0.812554369  | -4.365644056 |
| 1 | -0.898737755 | 0.779823795  | -4.978822304 |

**(MgO)<sub>10</sub>-(H<sub>2</sub>)<sub>18</sub>**

|    |              |              |              |
|----|--------------|--------------|--------------|
| 8  | 2.515034205  | 1.666758213  | -1.135737944 |
| 8  | -0.923990438 | 2.785593753  | -1.270026008 |
| 8  | 2.501710523  | -1.929867996 | -0.396944881 |
| 8  | -3.167561431 | -0.020319540 | -0.608352528 |
| 8  | -0.964474987 | -2.833759717 | -0.118392670 |
| 12 | -2.472727246 | -1.718248107 | -0.177609505 |
| 12 | 0.915741491  | -2.897489845 | -0.067167138 |
| 12 | 0.960742818  | 2.733447444  | -1.199028846 |
| 12 | -2.400709825 | 1.683960046  | -0.872329192 |
| 12 | 2.924024703  | -0.113691254 | -0.670645485 |
| 12 | 2.496240395  | 2.030024669  | 0.860389435  |
| 12 | -0.832880771 | 3.114263519  | 0.738422404  |
| 12 | 2.477825456  | -1.482507731 | 1.570838407  |
| 12 | -3.014455813 | 0.380668186  | 1.378836505  |
| 12 | -0.879777490 | -2.377344160 | 1.858203641  |
| 8  | -2.480370939 | -1.376076640 | 1.811439046  |
| 8  | 0.997295693  | -2.590886250 | 1.938989824  |
| 8  | 1.044782782  | 3.222414375  | 0.752970089  |
| 8  | -2.404418319 | 2.142252418  | 1.089412138  |
| 8  | 3.046404664  | 0.290865725  | 1.312717625  |
| 1  | 1.572854459  | 4.551964830  | -2.573211125 |

|   |              |              |              |
|---|--------------|--------------|--------------|
| 1 | 2.201703628  | 4.142500658  | -2.540035435 |
| 1 | -0.450684900 | 2.493922243  | -3.655130669 |
| 1 | -0.055480648 | 2.360967349  | -4.280209543 |
| 1 | -0.132730858 | -0.714909251 | -1.876966952 |
| 1 | 0.048196737  | -0.050101098 | -2.171510692 |
| 1 | 0.556320783  | -4.095642745 | -2.104322256 |
| 1 | 1.298595185  | -4.012398150 | -2.184904901 |
| 1 | -1.629267293 | 5.496377982  | 0.264216812  |
| 1 | -1.563646689 | 5.097972389  | -0.370305298 |
| 1 | -0.276753650 | 0.600904826  | 2.654803854  |
| 1 | 0.449928372  | 0.544767891  | 2.481302493  |
| 1 | -1.172129675 | -1.728887902 | 4.322570757  |
| 1 | -0.472278662 | -1.991409743 | 4.385305589  |
| 1 | 1.612878096  | -4.512174484 | 4.176562420  |
| 1 | 1.474383137  | -4.022576935 | 3.618920976  |
| 1 | 4.362556946  | 3.115254824  | -0.097335705 |
| 1 | 4.598016971  | 3.400471399  | 0.557762770  |
| 1 | 5.011861092  | -0.609953626 | -1.615512197 |
| 1 | 4.962112744  | 0.121429025  | -1.778752666 |
| 1 | 4.434263819  | -2.981017854 | 1.953372904  |
| 1 | 4.262981357  | -2.962885992 | 1.221127859  |
| 1 | -5.535654521 | 0.361324748  | 1.519688320  |
| 1 | -5.310891009 | 0.265191934  | 0.808633967  |
| 1 | -3.669829135 | 0.761390928  | 3.723315708  |
| 1 | -3.496664402 | 1.444067340  | 3.460934126  |
| 1 | -5.092111328 | -0.303942537 | -1.770241314 |
| 1 | -5.748237809 | -0.388875895 | -2.133076616 |
| 1 | -4.281802199 | 2.274269446  | -2.097746199 |
| 1 | -3.855402374 | 2.870349682  | -2.263220421 |
| 1 | 1.621591566  | -4.892369570 | 1.049988712  |
| 1 | 1.730978227  | -5.282378410 | 0.416172452  |
| 1 | -1.190791416 | -4.489883762 | 2.883897797  |
| 1 | -1.906336255 | -4.265678963 | 2.855536245  |
| 1 | -4.318044110 | -2.869993265 | 0.725858659  |
| 1 | -4.543022177 | -3.112751031 | 0.050509131  |

**Table S5.** Harmonic frequencies ( $\omega$ ) of the ground state structures of the  $(\text{MgO})_n$ ,  $n=1-10$  clusters with  $\text{H}_2$  at a def2-TZVP/BP86/D3 level theory.

| <b>MgO-(H<sub>2</sub>)<sub>n</sub></b> |         |         |         |         |         |         |         |         |
|----------------------------------------|---------|---------|---------|---------|---------|---------|---------|---------|
| 4.1                                    | 17.99   | 25.96   | 33      | 39.32   | 43.38   | 58.95   | 60.77   | 67.15   |
| 73.58                                  | 81.78   | 92.97   | 96.93   | 103.65  | 106.88  | 128.71  | 134.07  | 151.06  |
| 164.84                                 | 185.94  | 190.2   | 201.17  | 214.19  | 219.5   | 223.99  | 232.2   | 245.03  |
| 247.56                                 | 295.66  | 416.93  | 431.01  | 432.49  | 446.51  | 510.21  | 531.57  | 535.95  |
| 539.77                                 | 543.64  | 556.31  | 567.22  | 577.9   | 594.94  | 604.07  | 607.02  | 815.38  |
| 3983.09                                | 3988.01 | 4000.08 | 4018.99 | 4040.92 | 4057.94 | 4159.14 | 4179.15 | 4179.83 |

**(MgO)<sub>2</sub>-(H<sub>2</sub>)<sub>13</sub>**

|         |         |         |         |         |         |         |         |         |
|---------|---------|---------|---------|---------|---------|---------|---------|---------|
| 17.57   | 27.85   | 30.97   | 33.86   | 48.79   | 51.09   | 51.93   | 65.8    | 72.23   |
| 80.02   | 85.61   | 95.1    | 98.92   | 111.36  | 114.49  | 121.85  | 132.83  | 153.43  |
| 156.67  | 163.61  | 172.6   | 176.96  | 188.81  | 197.88  | 210.09  | 214.44  | 221.34  |
| 224.78  | 232.78  | 238.4   | 245.47  | 254.11  | 257.19  | 269.83  | 280.13  | 291.91  |
| 296.37  | 310.81  | 316.11  | 325.79  | 343.48  | 402.1   | 426.19  | 448.39  | 483.79  |
| 484.14  | 486.17  | 514.57  | 542.22  | 554.97  | 559.98  | 562.73  | 567.42  | 578.16  |
| 584.73  | 589.67  | 601.1   | 605.16  | 607.34  | 617.61  | 620.46  | 632.58  | 648.83  |
| 691.7   | 725.82  | 734.69  | 748.6   | 772.41  | 804.46  | 807.63  | 870.93  | 3911.54 |
| 3968.83 | 3982.59 | 4002.8  | 4007.73 | 4012.99 | 4018.33 | 4022.68 | 4024.61 | 4031.33 |
| 4052.14 | 4082.09 | 4164.36 |         |         |         |         |         |         |

**(MgO)<sub>3</sub>-(H<sub>2</sub>)<sub>12</sub>**

|         |         |         |         |         |         |         |         |         |
|---------|---------|---------|---------|---------|---------|---------|---------|---------|
| 11.07   | 20.13   | 23.91   | 46.27   | 50.01   | 52.46   | 57.18   | 59.89   | 63.32   |
| 66.06   | 72.53   | 79.25   | 87.7    | 92.83   | 109.54  | 120.42  | 128.49  | 138.82  |
| 163.69  | 165.63  | 171.22  | 173.03  | 179.88  | 183.67  | 187.39  | 197.68  | 198.96  |
| 205.95  | 209.58  | 227.59  | 232.19  | 233.61  | 246.81  | 257.53  | 263.02  | 265.24  |
| 268.59  | 276.68  | 291.26  | 297.36  | 303.1   | 341.67  | 427.67  | 451.18  | 452.35  |
| 478.01  | 485.43  | 492.34  | 495.28  | 503.69  | 506.16  | 513.07  | 525.16  | 531.77  |
| 537.85  | 539.27  | 562.99  | 566.76  | 581.11  | 586.04  | 712.96  | 714.05  | 742.2   |
| 745.44  | 748.44  | 752.39  | 761.8   | 767.08  | 780.53  | 786.82  | 787.93  | 805.89  |
| 3989.98 | 4016.62 | 4018.4  | 4030.54 | 4035.49 | 4044.68 | 4055.22 | 4061.61 | 4068.44 |
| 4077.66 | 4080.12 | 4101.68 |         |         |         |         |         |         |

**(MgO)<sub>4</sub>-(H<sub>2</sub>)<sub>14</sub>**

|         |         |         |         |         |         |         |         |         |
|---------|---------|---------|---------|---------|---------|---------|---------|---------|
| 10.55   | 15.2    | 15.53   | 19.42   | 21.92   | 25.78   | 27.05   | 31.07   | 32.47   |
| 34.13   | 38.05   | 38.65   | 45.33   | 49.36   | 52.85   | 55.15   | 62.46   | 65.16   |
| 69.05   | 77.82   | 79.57   | 83.3    | 86.16   | 86.81   | 92.34   | 96.84   | 116.79  |
| 120.77  | 124.38  | 139.25  | 144.56  | 145.67  | 163.94  | 185.04  | 186.95  | 197.19  |
| 198.86  | 209.65  | 220.51  | 226.43  | 240.02  | 247.6   | 250.99  | 255.33  | 269.92  |
| 301.29  | 319.69  | 322.87  | 336.21  | 337.55  | 338.94  | 342.17  | 345.05  | 356.49  |
| 360.96  | 362.38  | 369.02  | 372.77  | 376.6   | 417.8   | 430.61  | 437.03  | 500.94  |
| 504.42  | 506.77  | 508.15  | 516.74  | 523.56  | 529.41  | 530.64  | 559.65  | 571.39  |
| 579.38  | 582.92  | 584.86  | 585.22  | 665.01  | 696     | 699.94  | 706.3   | 717.4   |
| 719.65  | 723.33  | 728.67  | 744.07  | 823.2   | 827.23  | 843.45  | 4052.77 | 4053.73 |
| 4055.76 | 4058.4  | 4064.42 | 4068.17 | 4129.97 | 4130.65 | 4158.24 | 4161.34 | 4168.78 |
| 4174.54 | 4184.89 | 4185.02 |         |         |         |         |         |         |

**(MgO)<sub>5</sub>-(H<sub>2</sub>)<sub>16</sub>**

|         |         |         |         |         |         |         |         |         |
|---------|---------|---------|---------|---------|---------|---------|---------|---------|
| 7.86    | 11.1    | 16.55   | 18.08   | 21.07   | 24.54   | 30.63   | 34.32   | 35.06   |
| 39.02   | 40.32   | 42.38   | 44.22   | 46.42   | 50.91   | 51.34   | 53.4    | 57.66   |
| 59.32   | 60.4    | 62.67   | 65.17   | 66.02   | 71.07   | 74.79   | 76.29   | 81.44   |
| 85.45   | 86.02   | 99.2    | 103.08  | 105.57  | 115.16  | 120.92  | 124.77  | 132.1   |
| 133.38  | 137.02  | 143.81  | 146     | 151.46  | 154.37  | 195.24  | 199.05  | 205.89  |
| 209.42  | 214.92  | 215.11  | 226.79  | 228.73  | 239.39  | 241.64  | 245.92  | 250.54  |
| 254.32  | 269.46  | 294.36  | 296.36  | 303.38  | 314.6   | 317.61  | 323.43  | 325.51  |
| 343.95  | 353.24  | 355.72  | 356.46  | 359.01  | 373.09  | 378.49  | 379.56  | 398.54  |
| 399.7   | 413.55  | 431.15  | 440.55  | 486.34  | 510.02  | 518.99  | 526.12  | 532.37  |
| 532.97  | 561.75  | 576.92  | 579.28  | 584.3   | 588.43  | 590.08  | 607.05  | 609.62  |
| 679.74  | 687.22  | 692.06  | 695.29  | 701.02  | 706.27  | 714.75  | 715.33  | 718.43  |
| 785.66  | 787.83  | 873.02  | 879.57  | 886.21  | 4044.56 | 4046.99 | 4047.86 | 4051.17 |
| 4055.82 | 4056.86 | 4134.35 | 4151.87 | 4152.28 | 4162.87 | 4163.61 | 4169.57 | 4179.54 |
| 4181.64 | 4183.08 | 4186.06 |         |         |         |         |         |         |

**(MgO)<sub>6</sub>-(H<sub>2</sub>)<sub>17</sub>**

|         |         |         |         |         |         |         |         |         |
|---------|---------|---------|---------|---------|---------|---------|---------|---------|
| 30.05   | 42.34   | 43.55   | 54.67   | 58.7    | 63.6    | 70.14   | 73.05   | 76.2    |
| 77.14   | 78.23   | 80.82   | 87.87   | 92.27   | 92.89   | 94.96   | 98.77   | 102.9   |
| 103.25  | 107.4   | 114.29  | 121.73  | 124.61  | 129.26  | 133.61  | 134.76  | 137.15  |
| 139.31  | 145.24  | 152.37  | 163.31  | 165.28  | 180.12  | 184.58  | 189.07  | 191.79  |
| 196.26  | 198.4   | 200.66  | 204.57  | 210.49  | 215.2   | 220.37  | 228.32  | 231.69  |
| 236.04  | 240.3   | 243.32  | 250.02  | 255.46  | 264.97  | 275.24  | 278.36  | 287.48  |
| 291.83  | 300.55  | 308.01  | 313.39  | 316.31  | 325.39  | 361.22  | 364     | 367.34  |
| 378.51  | 382.71  | 388.86  | 397.7   | 402.71  | 404.2   | 408.08  | 413.85  | 415.9   |
| 430.01  | 451.89  | 452.83  | 463.09  | 473.85  | 480.77  | 496.73  | 497.46  | 500.63  |
| 502.72  | 520.18  | 526.06  | 541.19  | 543.53  | 566.01  | 569.93  | 599.95  | 600.47  |
| 608.31  | 610.54  | 616.58  | 626.5   | 641.51  | 643.95  | 647.39  | 660.45  | 699.86  |
| 743.81  | 748.48  | 750.32  | 751.55  | 756.98  | 758.11  | 768.02  | 815.35  | 858.22  |
| 864.49  | 881.31  | 905.34  | 985.92  | 1004.34 | 1168.8  | 1314.99 | 2630.29 | 3365.56 |
| 3628.3  | 3767.52 | 3861.18 | 4022.62 | 4039.57 | 4044.37 | 4057.77 | 4070.53 | 4082.34 |
| 4103.16 | 4103.85 | 4121.12 | 4128.51 | 4131.99 | 4136.61 |         |         |         |

**(MgO)<sub>7</sub>-(H<sub>2</sub>)<sub>16</sub>**

|        |        |        |        |        |        |        |        |        |
|--------|--------|--------|--------|--------|--------|--------|--------|--------|
| 23.4   | 40.85  | 51.27  | 55.06  | 70.36  | 80.03  | 82.57  | 83.94  | 86     |
| 88.34  | 91.82  | 93.23  | 95.43  | 101.56 | 103.93 | 104.19 | 106.95 | 118.03 |
| 120.67 | 128.58 | 130.58 | 139.02 | 147.05 | 148.57 | 150.41 | 156.51 | 158.78 |
| 163.59 | 168.96 | 169.33 | 173.95 | 175.04 | 176.34 | 190    | 197.12 | 204.46 |



|         |         |         |         |         |         |         |        |         |
|---------|---------|---------|---------|---------|---------|---------|--------|---------|
| 212.08  | 223.71  | 226.77  | 228.26  | 232.71  | 233.47  | 234.42  | 235.86 | 246.32  |
| 249.61  | 252.42  | 255.76  | 259.35  | 265.95  | 273.15  | 273.73  | 276.18 | 281.69  |
| 285.26  | 292.58  | 294.04  | 303     | 313.27  | 319.32  | 322.77  | 367.75 | 387.95  |
| 405.93  | 411.37  | 415.26  | 420.96  | 421.9   | 423.09  | 425.19  | 432.83 | 439.54  |
| 449.4   | 451.18  | 457.37  | 458.47  | 463.15  | 471.7   | 475.18  | 479.37 | 500.98  |
| 505.14  | 506.1   | 517.35  | 523.02  | 529.34  | 532.56  | 533.26  | 537.96 | 539.78  |
| 541.04  | 541.65  | 551.37  | 560.13  | 570.35  | 572.87  | 578.79  | 579.65 | 580.78  |
| 587.43  | 619.92  | 662.09  | 663.55  | 694.91  | 733.95  | 736.81  | 741.28 | 755.87  |
| 768.49  | 770.34  | 773.84  | 778.35  | 778.67  | 783.85  | 793.54  | 821.91 | 3948.35 |
| 3953.61 | 3956.49 | 3961    | 3976.52 | 3981.16 | 3986.86 | 3996.88 | 4039.7 | 4047.74 |
| 4057.94 | 4062.3  | 4072.07 | 4099.94 | 4109.21 | 4126.24 |         |        |         |

**(MgO)<sub>8</sub>-(H<sub>2</sub>)<sub>16</sub>**

|         |         |         |        |         |         |         |         |         |
|---------|---------|---------|--------|---------|---------|---------|---------|---------|
| 24.31   | 26.57   | 30.78   | 39.26  | 55      | 64.14   | 67.84   | 70.72   | 74.7    |
| 81.74   | 85.46   | 88.02   | 88.56  | 94.82   | 98.09   | 101.48  | 105.71  | 107.05  |
| 109.2   | 110.27  | 112.71  | 113.42 | 116.72  | 118.1   | 119.84  | 121.67  | 126.06  |
| 128.59  | 143.48  | 147.2   | 151.6  | 175.15  | 176.32  | 178.41  | 181.16  | 184.93  |
| 186.29  | 192.25  | 203.65  | 209.38 | 210.95  | 214.54  | 223.22  | 235.96  | 236.86  |
| 239.3   | 252.82  | 254.37  | 258.64 | 264.36  | 270.01  | 273.6   | 277.07  | 286.03  |
| 286.55  | 291.35  | 296.41  | 299.65 | 300.9   | 305.04  | 311.39  | 315.79  | 317.52  |
| 324.96  | 359.58  | 374.51  | 396.34 | 404.66  | 410.21  | 414.01  | 415.97  | 419.38  |
| 421.96  | 428.57  | 432.93  | 435.7  | 437.53  | 439.03  | 440.38  | 446.35  | 459.1   |
| 460.58  | 464.78  | 468.03  | 473.46 | 476.18  | 495.21  | 499.52  | 501.82  | 511.03  |
| 512.84  | 519.38  | 523.33  | 527.83 | 534.3   | 551.98  | 555.77  | 569.43  | 570.96  |
| 585.38  | 591.26  | 598.75  | 608.58 | 613.49  | 616.43  | 619.18  | 667.01  | 670.62  |
| 673.14  | 693.25  | 710.44  | 713.67 | 742.36  | 754.08  | 756.03  | 757.42  | 764.58  |
| 775.79  | 786.23  | 797.95  | 811.75 | 830.19  | 4018.24 | 4041.97 | 4058.57 | 4059.1  |
| 4069.49 | 4073.52 | 4078.29 | 4081.3 | 4089.56 | 4102.67 | 4110.37 | 4115.81 | 4116.77 |
| 4118.16 | 4126.01 | 4157.74 |        |         |         |         |         |         |

**(MgO)<sub>9</sub>-(H<sub>2</sub>)<sub>18</sub>**

|        |        |        |        |        |        |        |        |        |
|--------|--------|--------|--------|--------|--------|--------|--------|--------|
| 8.81   | 16.1   | 20.52  | 22.61  | 23.58  | 25.82  | 26.59  | 29.03  | 43.32  |
| 46.01  | 47.88  | 61.92  | 64.29  | 65.49  | 67.3   | 68.45  | 69.63  | 70.73  |
| 72.23  | 73.87  | 79.34  | 81.63  | 82.74  | 84.6   | 87.84  | 91.45  | 91.64  |
| 98.26  | 99.38  | 99.77  | 104.25 | 106.08 | 115.29 | 119.4  | 167.7  | 170.56 |
| 175.36 | 183.5  | 188.28 | 207.57 | 211.97 | 214.11 | 215.7  | 218.7  | 222.99 |
| 228.1  | 235.24 | 237.72 | 238.88 | 242.82 | 247.42 | 248.7  | 253.11 | 255.28 |
| 258.53 | 261.71 | 266.96 | 269.28 | 269.4  | 274.43 | 281.26 | 283.51 | 285.64 |
| 294.19 | 300    | 303.18 | 311.98 | 318.22 | 321.31 | 333.24 | 337.29 | 342.05 |
| 345.15 | 348.16 | 357.6  | 362.05 | 368.87 | 374.14 | 375.9  | 379.53 | 383.49 |
| 383.89 | 385.49 | 389.91 | 393.41 | 414.61 | 416.26 | 423.9  | 425.33 | 428.7  |
| 432.52 | 436.44 | 438.74 | 450.37 | 454.58 | 456.59 | 466.97 | 489.75 | 492.63 |
| 496.65 | 502.5  | 516.07 | 517.5  | 520.27 | 537.05 | 538.58 | 556.08 | 557.88 |
| 563.13 | 569.53 | 570.58 | 572.11 | 572.58 | 573.99 | 578.47 | 583.9  | 587.23 |
| 591.75 | 639.54 | 643.2  | 646.79 | 651.33 | 653.59 | 657.47 | 665.4  | 668.78 |

|         |         |         |         |         |         |         |         |         |
|---------|---------|---------|---------|---------|---------|---------|---------|---------|
| 681.4   | 699.65  | 707.57  | 713.78  | 731.91  | 739.58  | 740.13  | 746.36  | 747.58  |
| 749.99  | 753.21  | 773.27  | 4009.86 | 4016.03 | 4021.4  | 4023.76 | 4029.98 | 4041.07 |
| 4067.91 | 4072.12 | 4084.23 | 4100.6  | 4107.7  | 4110.42 | 4114.79 | 4140.72 | 4150.98 |
| 4156.02 | 4164.35 | 4167.25 |         |         |         |         |         |         |

**(MgO)<sub>10</sub>-(H<sub>2</sub>)<sub>18</sub>**

|         |         |         |         |         |         |         |         |         |
|---------|---------|---------|---------|---------|---------|---------|---------|---------|
| 7.16    | 17.31   | 21.38   | 30.87   | 33.4    | 34.46   | 35.5    | 37.25   | 42.26   |
| 44.54   | 44.99   | 50.63   | 57.48   | 61.14   | 63.62   | 66.73   | 68.52   | 70.43   |
| 74.49   | 78.67   | 81.32   | 83.71   | 89.45   | 93.6    | 96.05   | 97.45   | 100.12  |
| 101.96  | 111.67  | 114     | 115.61  | 118.6   | 121.87  | 123.53  | 123.91  | 127.01  |
| 140.79  | 144.09  | 145.71  | 163.09  | 176.57  | 179.71  | 180.67  | 184.36  | 190.83  |
| 196.93  | 203.57  | 205.65  | 209.97  | 213.16  | 217.54  | 227.53  | 228.62  | 230.98  |
| 240.49  | 243.84  | 250.15  | 253.56  | 256.23  | 261.7   | 267.17  | 268.59  | 270.83  |
| 273.19  | 276.32  | 279.33  | 281.95  | 284.83  | 293.54  | 297.17  | 299.29  | 301.21  |
| 308.2   | 310.52  | 313.88  | 322.04  | 325.98  | 327.02  | 331.51  | 332.85  | 335.34  |
| 338.14  | 352.34  | 355.08  | 362.32  | 367.25  | 368.85  | 370.45  | 372.43  | 376.16  |
| 377.68  | 381.64  | 382.48  | 387.33  | 388.68  | 393.9   | 397.86  | 399.91  | 404.9   |
| 408.97  | 410.36  | 423.55  | 426.31  | 432.49  | 434.54  | 438.27  | 440.56  | 443.75  |
| 449.16  | 461.13  | 461.47  | 482.99  | 513.75  | 517.55  | 530.83  | 543.04  | 554.67  |
| 562.98  | 565.74  | 568.85  | 574.36  | 585.57  | 660.38  | 671.27  | 673.77  | 690.48  |
| 691.93  | 694.32  | 695.89  | 705.28  | 709.17  | 714.88  | 717.9   | 718.53  | 722.87  |
| 725.36  | 726.48  | 733.7   | 735.54  | 744.58  | 748.42  | 753.55  | 762.33  | 771.24  |
| 3937.42 | 4007.48 | 4035.29 | 4046.54 | 4077.98 | 4085.08 | 4086.22 | 4097.69 | 4105.55 |
| 4110.22 | 4112.22 | 4121.65 | 4122    | 4128.71 | 4160.28 | 4161.53 | 4186.2  | 4186.96 |
